# Supplementary material
Source: PubMed Central journal article supplement (PMC5215776)
Supplement: NIHMS836417-supplement-Supplement1.pdf [file NIHMS836417-supplement-Supplement1.pdf]

## Supplementary Appendix

This appendix has been provided by the authors to give readers additional information about their work.

Supplement to: Punwani D, Zhang Y, Yu J, et al. Multisystem anomalies in severe combined immunodeficiency with mutant *BCL11B*. *N Engl J Med* 2016;375:2165-76. DOI: 10.1056/NEJMoa1509164

# Supplementary Appendix, Multisystem Anomalies in BCL11B Mutant Human Severe Combined Immunodeficiency

## Table of Contents:

|                                                                                                                                                                       |    |
|-----------------------------------------------------------------------------------------------------------------------------------------------------------------------|----|
| Investigators: .....                                                                                                                                                  | 1  |
| Supplementary methods .....                                                                                                                                           | 2  |
| Genetic and whole exome analysis .....                                                                                                                                | 2  |
| Chromatin immunoprecipitation-sequencing (ChIP-seq) .....                                                                                                             | 6  |
| Quantitative PCR primer sequences.....                                                                                                                                | 7  |
| Supplementary figures .....                                                                                                                                           | 8  |
| Figure S1. Gene and variant filtering approach.....                                                                                                                   | 8  |
| Figure S2. Human BCL11B protein sequence.....                                                                                                                         | 8  |
| Figure S3. Alignment of zebrafish <i>bcl11b</i> , human BCL11B and mouse <i>Bcl11b</i> proteins.....                                                                  | 9  |
| Figure S4: Site-specific effect of <i>bcl11ba</i> -MO injected into zebrafish. ....                                                                                   | 10 |
| Figure S5: Effect of splice site <i>bcl11b</i> morpholino on T cell development in zebrafish. ....                                                                    | 12 |
| Figure S6: pN441K mutation does not affect binding to CBP.....                                                                                                        | 12 |
| Figure S7: ChIP-seq method and results. ....                                                                                                                          | 14 |
| Figure S8: <i>Bcl11b</i> knockdown causes HSC displacement.....                                                                                                       | 15 |
| Figure S9: <i>Bcl11b</i> knockdown does not impair HSC emergence. ....                                                                                                | 15 |
| Figure S10. Effect of <i>ccr9b</i> dysregulation on thymic seeding in <i>bcl11b</i> morphants. ....                                                                   | 16 |
| Supplementary tables .....                                                                                                                                            | 18 |
| Table S1: Exome quality measures .....                                                                                                                                | 18 |
| Table S2: List of genes involved in primary immunodeficiencies <sup>5</sup> or T cell development...19                                                                |    |
| Table S3: Terms associated with T cell related phenotypes Mouse Genome Informatics and Human Phenotype Ontology Annotation, used to extend the target gene list. .... | 19 |
| Table S4: Terms obtained by using the target gene list as input to the ToppFun program.20                                                                             |    |
| Table S5: High priority variants from exome sequence analysis. ....                                                                                                   | 25 |
| Table S6 Best candidate genes and annotations. ....                                                                                                                   | 26 |
| References.....                                                                                                                                                       | 27 |

## Investigators:

Divya Punwani, Ph.D.<sup>1,2</sup>, Yong Zhang, M.D., Ph.D.<sup>2,3</sup>, Jason Yu, Ph.D.<sup>1</sup>, Morton J. Cowan, M.D.<sup>1</sup>, Sadhna Rana, Ph.D.<sup>4</sup>, Antonia Kwan, M.D., Ph.D.<sup>1</sup>, Aashish N. Adhikari, Ph.D.<sup>5</sup>, Carlos O. Lizama, Ph.D.<sup>6</sup>, Bryce A. Mendelsohn, M.D.<sup>1</sup>, Shawn P. Fahl, Ph.D.<sup>3</sup>, Ajithavalli Chellappan<sup>4</sup>, Rajgopal Srinivasan, Ph.D.<sup>4</sup>, Steven E. Brenner, Ph.D.<sup>5</sup>, David L. Wiest, Ph.D.<sup>3,7</sup>, Jennifer M. Puck, M.D.<sup>1,7</sup>

<sup>1</sup> Department of Pediatrics, University of California San Francisco School of Medicine and UCSF Benioff Children's Hospital, San Francisco, CA 94158

<sup>2</sup> Drs. Punwani and Zhang contributed equally.

<sup>3</sup> Blood Cell Development and Function Program, Fox Chase Cancer Center, Philadelphia, PA 19111-2497

<sup>4</sup> Innovation Labs, Tata Consulting Services, Hyderabad 50019, Telangana, India

<sup>5</sup> Department of Plant and Microbial Biology, University of California, Berkeley, CA 94720

<sup>6</sup> Cardiovascular Research Institute, University of California San Francisco, San Francisco, CA 94143

<sup>7</sup> Drs. Wiest and Puck contributed equally.

## Supplementary methods

### Genetic and whole exome analysis

Initial Sanger sequence of B+ SCID genes *CD3D*, *CD3E*, *CDEZ*, *IL2RG*, *IL7R*, *JAK3*, *PNP*, *PTPRC*, *RMRP*, and *ZAP70* in the patient was normal. The patient and healthy father shared a heterozygous deletion within chromosome 3q25.1 (genes *CLRN1-AS1* to *P2RY12*, inclusive) of unknown significance.

Exome sequencing (HiSeq2500, Illumina) followed capture with a Nimblegen v3.0 kit with analysis to identify rare protein-altering variants based on human genome build 37 (Genome Reference Consortium GRCh37, Feb 2009). Read alignment and variant calling were performed as described.<sup>1</sup> Basic quality metrics are in Table S1. Using an in-house annotation tool, Varant (30 Sep 2014)<sup>2</sup> variants were annotated as NonSyn, StartGain, StartLoss, StopGain, StopLoss, FrameShiftInsert, FrameShiftDelete, NonFrameShiftDelete, NonFrameShiftInsert, SpliceAcceptor, SpliceDonor, CDS\_not\_multiple\_of\_3. Only variants with genotype quality (GQ) scores  $\geq 30$  and minor allele frequencies (MAF)  $\leq 0.02$  in both 1000 Genomes Phase 3 (accessed Nov 2014)<sup>3</sup> and Exome Sequencing Project database, v2<sup>4</sup> were retained for downstream analysis. Additionally, variants in the proband were required to follow compound heterozygous, homozygous recessive, X-linked recessive, or uniparental disomy inheritance models or to be *de novo* (absent in both parents). These filtering steps shortlisted 57 variants in 38 genes for further analysis (Figure S1).

No shortlisted variants were in our target gene list (Table S2) extracted from reported human primary immunodeficiency (PID) genes.<sup>5</sup> We therefore expanded the list to include interacting partners of the target genes, extracted from BioGRID v3.2,<sup>6</sup> MINT release 21 Dec 2010<sup>7</sup> and HPRD release 9 (13 Apr 2010),<sup>8</sup> as included in the Pathway Commons database v5 (Nov 2011).<sup>9</sup> The list was further expanded to include genes associated with T cell related phenotype terms (Table S3) in either the Mouse Genome Informatics (MGI) (12 Jan 2014),<sup>10</sup> with files accessed from databases:

<ftp://ftp.informatics.jax.org/pub/reports/index.html>,

[ftp://ftp.informatics.jax.org/pub/reports/VOC\\_MammalianPhenotype.rpt](ftp://ftp.informatics.jax.org/pub/reports/VOC_MammalianPhenotype.rpt),

[ftp://ftp.informatics.jax.org/pub/reports/MGI\\_PhenoGenoMP.rpt](ftp://ftp.informatics.jax.org/pub/reports/MGI_PhenoGenoMP.rpt),

[ftp://ftp.informatics.jax.org/pub/reports/HMD\\_HumanPhenotype.rpt](ftp://ftp.informatics.jax.org/pub/reports/HMD_HumanPhenotype.rpt),

[ftp://ftp.informatics.jax.org/pub/reports/MPheno\\_OBO.ontology](ftp://ftp.informatics.jax.org/pub/reports/MPheno_OBO.ontology), or in the Human Phenotype Ontology Annotation (HPO) (28 Jan 2014):

[http://compbio.charite.de/jenkins/job/hpo.annotations.monthly/lastStableBuild/artifact/annotation/ALL\\_SOURCES\\_ALL\\_FREQUENCIES\\_diseases\\_to\\_genes\\_to\\_phenotypes.txt](http://compbio.charite.de/jenkins/job/hpo.annotations.monthly/lastStableBuild/artifact/annotation/ALL_SOURCES_ALL_FREQUENCIES_diseases_to_genes_to_phenotypes.txt) and

[http://compbio.charite.de/jenkins/job/hpo.annotations/lastStableBuild/artifact/misc/phenotype\\_annotation.tab](http://compbio.charite.de/jenkins/job/hpo.annotations/lastStableBuild/artifact/misc/phenotype_annotation.tab)<sup>11</sup>

The shortlisted 57 variants were matched against this expanded gene list, resulting in 5 high quality variants in 3 genes: *BCL11B*, *NRLP1*, and *USO1*. We also considered a variant in the *CAPNS1* gene with genotype quality of 27, slightly lower than our default threshold of confidence. The variant genes were scored as described below.

#### *Gene and variant prioritization (annotations, data sources and scoring criteria)*

We developed an *ad hoc* approach to ranking candidate genes and variants among the shortlisted variants, looking for genes with features including interactions and shared pathways similar to those of known target genes. Additionally, we identified variants

predicted to be deleterious and following an appropriate inheritance pattern. To prioritize genes, we created a profile of target gene characteristics based on enriched annotation terms. We obtained enriched ( $p < 0.05$ ) annotation terms (Table 4) for the annotation categories medical conditions, pathways, genome ontology, human phenotype ontology, and mouse phenotype ontology, by uploading the target gene list to the ToppFun website (accessed 20 Oct 2013) at <https://toppgene.cchmc.org/enrichment.jsp>.<sup>12</sup> We scored the top shortlisted variants as follows:

1) The interacting partners of target genes were extracted from BioGRID v3.2,<sup>6</sup> MINT release 21 (Dec 2010)<sup>7</sup> and HPRD release 9 (13 Apr 2010)<sup>8</sup> databases as included in the Pathway Commons database v5 (Nov 2011).<sup>9</sup> A candidate gene interacting with at least one target gene based on a high-throughput study was assigned a score of 1. If the interaction was supported by at least one low-throughput experiment (biochemical studies *in vitro* or *in vivo*) it was assigned a score of 2.

2) Mammalian Phenotype Ontology (MPO) and HPO terms were sought that matched those assigned to known target genes. Gene-to-phenotype associations from MPO were from the MGI website (12 Jan 2014)

<ftp://ftp.informatics.jax.org/pub/reports/index.html>.<sup>10</sup>

HPO associations (28 Jan 2014) were from

[http://compbio.charite.de/jenkins/job/hpo.annotations.monthly/lastStableBuild/artifact/annotation/ALL\\_SOURCES\\_ALL\\_FREQUENCIES\\_diseases\\_to\\_genes\\_to\\_phenotypes.txt](http://compbio.charite.de/jenkins/job/hpo.annotations.monthly/lastStableBuild/artifact/annotation/ALL_SOURCES_ALL_FREQUENCIES_diseases_to_genes_to_phenotypes.txt) and [http://compbio.charite.de/jenkins/job/hpo.annotations/lastStableBuild/artifact/misc/phenotype\\_annotation.tab](http://compbio.charite.de/jenkins/job/hpo.annotations/lastStableBuild/artifact/misc/phenotype_annotation.tab).<sup>11</sup> A candidate gene associated with low or absent T cells was assigned a score of 2 (Table S3), reflecting the proband's phenotype. Any other phenotype of the candidate gene that matched a phenotype in the target gene profile was assigned a score of 0.5.

3) Gene ontology (GO) terms matching those assigned to known target genes were extracted from the UniProt database (Nov 2014),

[ftp://ftp.ebi.ac.uk/pub/databases/uniprot/current\\_release/knowledgebase/taxonomic\\_divisions/uniprot\\_sprot\\_human.dat.gz](ftp://ftp.ebi.ac.uk/pub/databases/uniprot/current_release/knowledgebase/taxonomic_divisions/uniprot_sprot_human.dat.gz).<sup>13</sup> A candidate gene with the following enriched GO terms was awarded a score of 1: T cell activation, T cell differentiation, T cell differentiation in thymus, regulation of T cell activation, T cell receptor signaling pathway, regulation of T cell differentiation, T cell receptor complex, T cell receptor binding.

All other GO annotations for a candidate gene that matched those in the target gene profile received a score of 0.5.

4) Gene-pathway associations were extracted from the Pathway Commons v5 (Nov 2011).<sup>9</sup> We used its constituent databases: NCI-NATURE from the Pathway Interaction Database,<sup>14</sup> HumanCyc v17.1<sup>15</sup> and Reactome v46. A candidate gene that shared at least one pathway with the pathways in the target gene profile was assigned a score of 1. Exceptions to this rule were enriched pathways associated with candidate genes that we deemed to be less informative. Specifically the pathways "adaptive immune system," "innate immune system," and "apoptosis" were assigned a score of 0.5.

5) Gene associations with medical conditions were extracted from Online Mendelian Inheritance in Man (OMIM) (accessed 21 Jan 2014),<sup>17</sup> Genetic Association Database (GAD) (18 Jan 2014), <http://geneticassociationdb.nih.gov/><sup>18</sup> and NHGRI-GWAS (21 Jan 2014) v1 accessed from [www.ebi.ac.uk/gwas](http://www.ebi.ac.uk/gwas).<sup>19</sup> A candidate gene that shared at least one condition with one of the medical conditions in the target gene profile was assigned a score of 1.

We also scored genes based on annotations of their variants, as follows:

6) Homozygous, compound heterozygous, or X-linked variants were given a score of 2. A list of putative haploinsufficient genes compiled from an automated OMIM and literature survey<sup>20</sup> was used to annotate the candidate genes. All *de novo* variants in putatively haploinsufficient genes were assigned a score of 2, and the remaining *de novo* variants were assigned a score of 1.

7) Variants predicted to be deleterious by any of PolyPhen2 v2.2.2 (Feb 2012) <http://genetics.bwh.harvard.edu/pph2/><sup>21</sup> SIFT (Human\_db\_37\_ensembl\_63, Aug 2011 <http://sift.jcvi.org>)<sup>22</sup> or CADD version 1.2 (CADD score  $\geq 20$ )<sup>23</sup> were assigned a score of 2. The PolyPhen2 and SIFT scores were extracted from dbNSFP v2.1.<sup>24,25</sup> Variants predicted to be probably deleterious by PolyPhen2 or having CADD scores 14-20 were assigned a score of 1. Variants with CADD scores  $< 14$  were assigned a score of 0.5.

The variant and gene annotations and their scores are summarized in Tables S5 and S6. We also analyzed heterozygous gene deletions in the proband inherited from the father (*CLRN1-AS1*, *MED12L*, *RNA5SP145*, *GPR171*, *P2RY14*, *SETP11*, *GPR87*, *P2RY13*, *P2RY12*); however, we found no associations between these genes and our target genes.

#### *Manual analysis of top candidate gene BCL11B*

The B-Cell CLL/Lymphoma 11B gene (*BCL11B*) harboring a heterozygous *de novo* missense mutation emerged as the best candidate (Table S6), based on the following annotations:

1) Protein-protein interactions reported in the BioGRID database revealed associations of murine *Bcl11b* with Notch1, *Il2*, and *Foxp3* proteins (proteins involved in T cell development and activation). Since neither Notch1 nor *Foxp3* were part of our target gene list, only the *Il2*-*Bcl11b* interaction was identified by our automated approach. The Notch1 and *FoxP3* interactions were noted later based on a manual survey of the literature.<sup>26,27</sup> As reported in BioGRID database, the human Notch1-*BCL11B* interaction and murine *Foxp3*-*Bcl11b* interaction were identified by high-throughput affinity capture experiments followed by western blotting.<sup>28,29</sup> The mouse *Bcl11b*-*Il2* interaction was supported by biochemical studies<sup>30</sup> and hence was given higher priority than interactions in other shortlisted genes where such support was lacking.

2) Querying the MPO for T cell related key terms found *Bcl11b* annotated with “decreased double-negative T cell number,” or reduced number thymic T cells that express neither CD4 nor CD8. Relevance of this annotation was confirmed by literature search, as the paper<sup>31</sup> reported block of T cell development at CD4-CD8- double negative stage in mice with defective *Bcl11b*(<sup>-/-</sup>) gene.

3) The GO annotation for *BCL11B* “T cell differentiation in thymus” was extracted automatically from the UniProt database (Nov 2014).<sup>13</sup> Manual inspection revealed that it was inferred from electronic annotation. To find the original annotation resource linked to publication, we browsed the AmiGO website that gives original databases and publications for their annotations,<sup>32</sup> learning that the GO annotation was derived from the MGI database with support from the literature on experimental validation of the association of *BCL11B* with T cell development.<sup>31</sup>

4) The Pathways Commons (v5) used for the analysis did not report *BCL11B* to be associated with any of the enriched pathways used in this analysis. A manual review of the literature identified a study showing that *BCL11B* has a role in TCR/CD28 signaling to

trigger T cell activation.<sup>37</sup> The gene participates in the activation of *IL2* gene expression by enhancing the activation of NF $\kappa$ B via enhanced cot-kinase expression.

5) Disease databases used in this study did not report association of *BCL11B* with human immunodeficiency. However, mouse studies indicated involvement of *Bcl11b* in inflammatory bowel disease<sup>38</sup> and autoimmune encephalomyelitis.<sup>39</sup> Human *BCL11B* is associated with lymphoblastic leukemia.<sup>40</sup>

6) *BCL11B* was annotated as putatively haploinsufficient by automated text extraction,<sup>20</sup> based on a PubMed abstract showing *Bcl11b*<sup>+/-</sup> mice susceptible to  $\gamma$ -ray-induced thymic lymphomas.<sup>41</sup>

7) The *BCL11B* variant was predicted deleterious by SIFT and PolyPhen2, while CADD assigned a borderline score of 14. We confirmed the effect prediction for the *BCL11B* variant using SNAP (SNAPfun, 2 Apr 2014), <http://rostlab.org/services/snap/>.<sup>42</sup> Additional observations of conservation, allele frequency and other features confirmed the automated tools' predictions. For example, GERP++ from DBNSFP2.0<sup>43</sup> gave an RS score of 3.96 for the *BCL11B* variant position, with scores >2 usually regarded as evolutionarily conserved and potentially functional.

8) We also investigated the protein domains and alignments of BCL11B, a zinc finger transcription factor that binds DNA via its second and third zinc finger domains. The proband's *de novo* missense variant pN441K lies in the second zinc finger domain spanning residues 427-455, completely conserved between mice and humans, and the amino acid N441 is completely conserved in mammals (Figure S2).

## Chromatin immunoprecipitation-sequencing (ChIP-seq)

A schematic representation of the workflow for the Chromatin immunoprecipitation-sequencing experiment is shown in Figure S6,A and described below.

### *Transduction of human HSC*

WT and mutant (mut) *BCL11B* cDNAs were 3'-FLAG-tagged and subcloned into the green fluorescent protein (GFP)-expressing, lentiviral vector pLenti CMV/TO GFP-Zeo DEST (Addgene). Human CD34<sup>+</sup> HSC selected from peripheral blood mobilized stem cells using CD34 microbeads (Miltenyi Biotech) were transduced with WT or mutant *BCL11B* or pLenti CMV/TO GFP-Zeo DEST vector, with no *BCL11B* insert (empty vector, GFP control). The cells were cultured for 14 days at 37°C in HSC medium: X-Vivo-15 (Lonza) with 100ng/ml human SCF, Flt3L and thrombopoietin, and 20ng/ml IL-3 (all from Peprotech). DNA from an aliquot of cells was extracted on day 10 of the culture to determine vector copy number by quantitative PCR.

- HSC + WT *BCL11B*: VCN = 6±1
- HSC + mut *BCL11B*: VCN = 10±1
- HSC + empty vector, GFP control: VCN = 11±1

### *Selection of transduced HSC and ChIP-seq*

GFP expressing transduced cells were sorted into three separate tubes from each sample (FACS Jazz, BD Biosciences) and DNA from cells in each of the triplicate tubes was sonicated to mean size of 250 bp and used for chromatin immunoprecipitation with the iDeal ChIP-seq kit for Transcription Factors (Diagenode), following the manufacturer's instructions. DNA co-precipitated with anti-FLAG antibody (M2, Sigma Aldrich) was sequenced by the University of California, Davis, Genome Center on a HiSeq 4000 sequencer (Illumina) to obtain 90bp single reads.

### *Analysis of sequences*

The ChIP-seq reads were groomed using FASTQ groomer V1.04,<sup>44</sup> and groomed reads were mapped to the human genome (build hg38) using BWA for the Illumina v1.2.3 program.<sup>45</sup> The MACS callpeak v2.1.0.201511222.0 program<sup>46</sup> was used to determine enriched *BCL11B* peaks using GFP-ChIP as control. The parameters for MACS were: effective genome size = 2.45e09; tag size = 36 (use 50, sequence 36 bp); model fold 2.5; FDR (q-value) cutoff 0.05. IDR 2012<sup>47</sup> was used to check the reproducibility of the peaks among replicated with an FDR (q-value) cutoff 0.05. The ChIP-seq peaks were visualized using IGB v9.0.0.<sup>48</sup> To insure that all of the experiments were processed consistently, all of the above steps were performed as part of a Galaxy workflow, which can be found at <https://usegalaxy.org/u/laiumiunix/w/chipseq>. All sequences were uploaded to the Gene Expression Omnibus (GEO) database, <http://www.ncbi.nlm.nih.gov/geo/>; accession number GSE84941.

### *Results*

Two *BCL11B* target binding sites were found in the *BCL11B* gene itself, one in exon 2 (*BCL11B\_1*) and the other in exon 4 (*BCL11B\_2*) of transcript variant 1 (NM\_138576). *BCL11B\_1* showed a 25-fold increase, and *BCL11B\_2* showed a 30-fold increase in *BCL11B* binding compared to the background GFP control, while the *BCL11B* mutant exhibited 2- to

5-fold less binding to these sites, respectively, demonstrating that the mutant protein had a lower binding affinity for these sites compared to the WT. In contrast, a unique site in the 5' untranslated region of *TACC1* isoform 1 (NM\_006283.2), encoding transforming acidic coiled-coil containing protein 1, was bound only by mutant BCL11B, but not WT, with a mean 6-fold increase compared to binding by the GFP controls.

The differential binding of WT and mutant samples for all three sites was confirmed by quantitative PCR using aliquots of the DNA obtained after immunoprecipitation with anti-FLAG antibody (shown in Figure 3H, main text). A schematic representation of ChIP-seq methods, analysis and results is shown in Figure S5.

These results suggested that our patient's mutation in the DNA binding domain of BCL11B may have altered the DNA binding specificity, causing the mutant protein to exhibit decreased binding to canonical BCL11B target sites, while simultaneously increasing binding to novel sites.

### Quantitative PCR primer sequences

| Human gene    | Forward primer               | Reverse primer              |
|---------------|------------------------------|-----------------------------|
| <i>BCL11B</i> | ATGCTATTCTTGCCTTTCATTTTCAGAA | TCCAAACTCAACTTGA ACTCTCATCT |
| <i>CCR7</i>   | TGAGGTCACGGACGATTACAT        | GTAGGCCACGAAACAAATGAT       |
| <i>CCR9</i>   | ACAGCCAAATCAAGGAGGAATC       | CAGCAAGCCATGACCACGA         |



## Supplementary figures

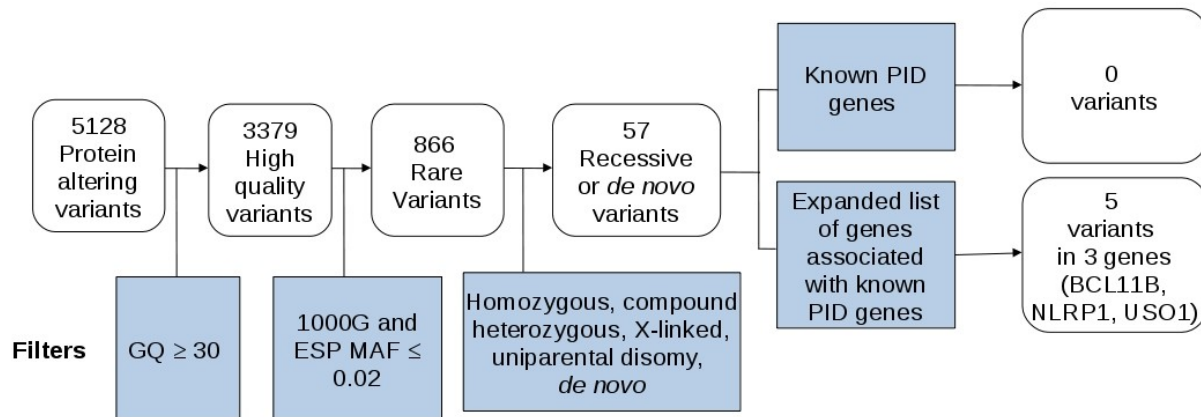

**Figure S1. Gene and variant filtering approach.**

Variant filtering for proband, showing sequentially applied filters for protein altering variants, quality ( $GQ \geq 30$ ) and minor allele frequency ( $MAF \leq 0.02$ ), yielding a set of 866 rare variants that were further annotated based on inheritance models. Since the proband's parents were healthy, the analysis was further restricted to variants that were inherited in a recessive manner or were de novo. This set was further divided into variants in known primary immunodeficiency genes vs. genes in the extended list that included interacting partners. Five shortlisted high quality variants were obtained in 3 genes (*BCL11B*, *NLRP1*, *USO1*).

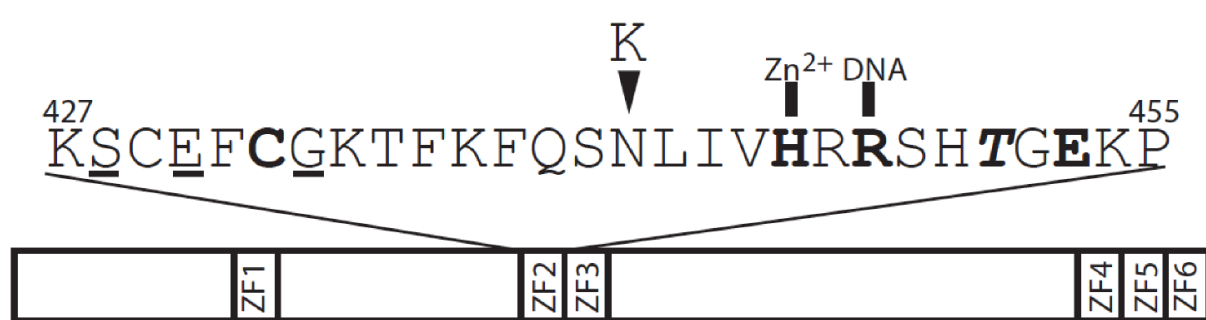

**Figure S2. Human BCL11B protein sequence.**

Protein NP\_612808.1 diagram with zinc finger (ZF) positions and features of highly evolutionarily conserved ZF2, residues 427-455; the H445 coordinates the  $Zn^{+2}$  ion, while R447 binds to DNA backbone and nucleotide bases at target sites.<sup>49</sup> Patient mutation, pN441K, is shown by inverted triangle. Somatic mutation sites in T-cell acute leukemia are in **bold** and *italics*;<sup>49,50</sup> sites mutated in melanoma or lung cancer are underlined (COSMIC database,<sup>51</sup> COSM3499636 S428L, COSM3499635 E430K, and COSM349009 G433A).

|            |                                                               |     |
|------------|---------------------------------------------------------------|-----|
| _zebrafish | MSRRKQGNPQHLSQREIITPEAEHVDAVLADLHSHPHPLDPSMPGPPGLGDHDDL       | 60  |
| _Human     | MSRRKQGNPQHLSQRELIITPEADHVEAAILEDEGLE---IEEPSGLG-LMVGPPDPLL   | 56  |
| _Mouse     | MSRRKQGNPQHLSQRELIITPEADHVEATILEDEGLE---IEEPSLGL-LMVGPPDPLL   | 56  |
|            | *****;*****;***: * . : ** * * * * *                           |     |
| _zebrafish | TCGQCQLTFPLGDILLFIEHKKKQCALTSGHGCDKMDRNSPSP-PAELRKVVEPVE      | 119 |
| _Human     | TCGQCQMNFPPLGDILVFIHKKKQCGS--LGACYDKALDKDSDPPSSRSELRRVSEPVE   | 114 |
| _Mouse     | TCGQCQMNFPPLGDILVFIHKKKQCGG--LGPCYDKVLKSSPPSSRSELRRVSEPVE     | 113 |
|            | *****.*****;*****;***. ---LPCYDKVLKSSPPSSRSELRRVSEPVE         |     |
| _zebrafish | IGIQVTPEEEDERLLTPPKGICPKQES-----                              | 146 |
| _Human     | IGIQVTPEDED-DHLLSPTKGIKPKQENIAGPCRPAQLPAVAPIAAS-SHPHSSVITSPLR | 172 |
| _Mouse     | IGIQVTPEDED-DHLLSPTKGIKPKQENIAGPCRPAQLPSMAPIAASSHPPTSVITSPLR  | 172 |
|            | *****;*: :;***: * *****.                                      |     |
| _zebrafish | -----GLAGRDEPSSYICTTCKQFFT                                    | 168 |
| _Human     | ALGALPPCLPLCCSARPVSGDGTQEGEQTEAPFGCQCQLSGKDEPSSYICTTCKQFFNS   | 232 |
| _Mouse     | ALGVLPPCFPLPCCGARPISGDGTQEGEQMEAPFGCQCQLSGKDEPSSYICTTCKQFFNS  | 232 |
|            | *:*****.                                                      |     |
| _zebrafish | AWFLQLQAQNTHGRIYLETNSSTSLTPRITIPPIGAESIPQSPLTNFLGDNPPFHL      | 228 |
| _Human     | AWFLQLQAQNTHGFRILEPFPASSSLTPRLTIPPLGPEAVAQSPLMNFGDSNPFNLL     | 292 |
| _Mouse     | AWFLQLQAQNTHGFRILEPFPASTSLTPRLTIPPLGPETVAQSPLMNFGDSNPFNLL     | 292 |
|            | *****;***** .:*****;***** * *: * * * * * . * * *              |     |
| _zebrafish | RMTGPLLEREPPGFVENRIPNTPPFVSPPPRHLLDPRHLERLSAEEMGLISQHPSAFERV  | 288 |
| _Human     | RMTGPILRDH-PGFGEGRLLPGLPPLFSPPPRHLLDPRH--LSAEEMGLVAQHPSAFDRV  | 348 |
| _Mouse     | RMTGPILRDH-PGFGEGRLLPGLPPLFSPPPRHLLDPRH--LSAEEMGLVAQHPSAFDRV  | 348 |
|            | *****;*: * * * * *: * * * * :***** *****;*****;**             |     |
| _zebrafish | MRMTPMAMESQSMDFSRRLRELAGNNSTPPLSPSRANPMHLLNPNPFQSPKSPFLST     | 348 |
| _Human     | MRLNPMIDSPAMDFSRRLRELAGNSSTPPVSPGRGNPMHLLN--PFQSPKSPFLST      | 406 |
| _Mouse     | MRLNPMIDSPAMDFSRRLRELAGNSSTPPVSPGRGNPMHLLN--PFQSPKSPFLST      | 406 |
|            | **:.***;*: * *****. : * * * * . * * * * * *****               |     |
| _zebrafish | PPLPMPNPTTPPQTQGKSKSCEFCGKTFKFSNIVHRRSHTGEKPKYKQLCDHACSQ      | 408 |
| _Human     | PPLPMPNPTTPPQTQGKSKSCEFCGKTFKFSNIVHRRSHTGEKPKYKQLCDHACSQ      | 466 |
| _Mouse     | PPLPMPNPTTPPQTQGKSKSCEFCGKTFKFSNIVHRRSHTGEKPKYKQLCDHACSQ      | 466 |
|            | ***** * * * * .*****;*****;*****;*****;*****                  |     |
| _zebrafish | ASKLKRHMKTMMHKAGSLAGRSDDGLSAASSPEPGTSELAGEGLKAADGDFRHHESDPSL  | 463 |
| _Human     | ASKLKRHMKTMMHKAGSLAGRSDDGLSAASSPEPGTSELAGEGLKAADGDFRHHESDPSL  | 526 |
| _Mouse     | ASKLKRHMKTMMHKAGSLAGRSDDGLSAASSPEPGTSELAGEGLKAADGDFRHHESDPSL  | 524 |
|            | *****;*****;*: *****;*****;*: * : * * * * : .                 |     |
| _zebrafish | ----IQNEEEEEEEEEELNESRPFNSMDSFRCNRRENGSK-----P                | 505 |
| _Human     | GHEPEEEDDEEEEEELLESRPFNSMDSFRCNRRENGGGVPGVPGAGGGAACA          | 586 |
| _Mouse     | GPEPEDED-EEEEEEEEELLESRPFNSMDSFRCNRRENGGGVPGVPGAGGGAACA       | 582 |
|            | : : : ***** *****;*****; * * * * .                            |     |
| _zebrafish | PSDEKTLSLGKVMENVGLSSIQQYNNLIVDNKRKLPFSKRISEVQREVGDSDSVDGEMDQ  | 565 |
| _Human     | LADEKALVLGKVMENVGLGALPQYGEELLADKQKRGAPLKAAGGG-DAGDDDDAGGCGDA  | 645 |
| _Mouse     | LADEKALALGKVMEDAGLALPQYGE-----KRGAPLKAAGDTG-DAG----AVGCGDA    | 631 |
|            | ***: * * * * : : * * * * : * * * * . : * * * * . * * *        |     |
| _zebrafish | VERATVNRNCG---SGDSFSLFPRKPTITSPSLNS---SNKRIKIEKDLDIPPAAL      | 619 |
| _Human     | GAGGAVNRGGGFAPGTEFPPLFPRKPAPLPSPGLNS---AAKRIKIEKDLLELPPAAL    | 701 |
| _Mouse     | GAPGAVNRGGGFAPGTEFPPLFPRKPAPLPSPGLGPPALHAAKRIKIEKDLLELPPAAL   | 691 |
|            | .:***: * . : * * .*****;*: * * * * : *****;*****;*** *        |     |
| _zebrafish | IPSENVYSQWLGVYAASRHFIDPFLGFTDSRQSPFATSSSEHSENGSLRFSTPPGDLLD   | 679 |
| _Human     | IPSENVYSQWLGVYAASRHFMDPFLGFTDARQSPFATSSSEHSENGSLRFSTPPGDLLD   | 761 |
| _Mouse     | IPSENVYSQWLGVYAASRHFMDPFLGFTDARQSPFATSSSEHSENGSLRFSTPPGDLLD   | 751 |
|            | *****;*****;*****;*****;*****;*****;*****;*****               |     |
| _zebrafish | GGLSGRSGTASGGSTPHLGGPGPRPSSKESRRSDTCEYCGKVFKNCSNLTVHRRSHTG    | 739 |
| _Human     | GGLSGRSGTASGGSTPHLG-GPGGPRPSSKEGRRSDTCEYCGKVFKNCSNLTVHRRSHTG  | 820 |
| _Mouse     | GGLSGRSGTASGGSTPHLG-GPGGPRPSSKEGRRSDTCEYCGKVFKNCSNLTVHRRSHTG  | 810 |
|            | ***** *****. *****;*****;*****;*****;*****                    |     |
| _zebrafish | ERPDKCELNYACAQSSKLRHMKTTHGQIGKEVYRCDICQMPFSVYSTLEKHMKKWHGEH   | 799 |
| _Human     | ERPDKCELNYACAQSSKLRHMKTTHGQIGKEVYRCDICQMPFSVYSTLEKHMKKWHGEH   | 880 |
| _Mouse     | ERPDKCELNYACAQSSKLRHMKTTHGQIGKEVYRCDICQMPFSVYSTLEKHMKKWHGEH   | 870 |
|            | *****;*****;*****;*****;*****;*****;*****;*****               |     |
| _zebrafish | LMTNEVKIEQAERS 813                                            |     |
| _Human     | LLTNDVKIEQAERS 894                                            |     |
| _Mouse     | LLTNDVKIEQAERS 884                                            |     |
|            | *:*****                                                       |     |

**Figure S3. Alignment of zebrafish bcl11b, human BCL11B and mouse Bcl11b proteins.**

Human and zebrafish proteins are 73% identical, indicated by “\*” beneath shared residues. The DNA binding zinc finger domains 2 and 3, including the pN441 (outlined in red) mutated to K in the SCID patient, are conserved between human, mouse and zebrafish.

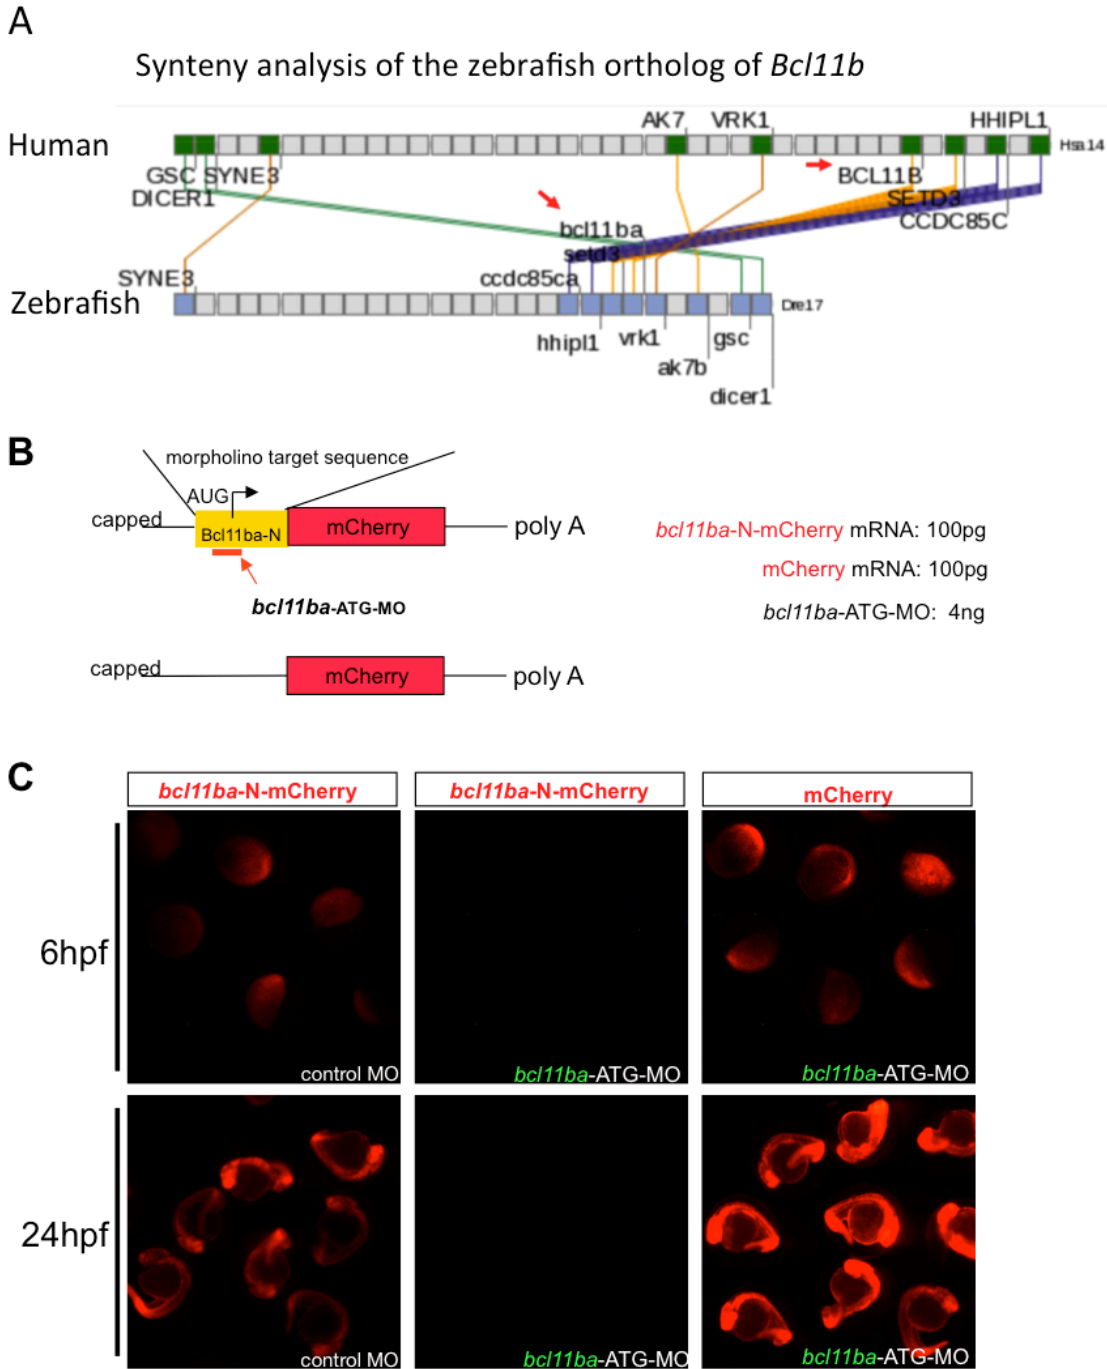

**Figure S4: Site-specific effect of *bcl11ba*-MO injected into zebrafish.**

A, Chromosomal synteny between zebrafish *bcl11b* and human *BCL11B* orthologs; B, Schematic diagrams of *bcl11ba-N-mCherry* fluorescent reporter mRNAs, the upper one containing the *bcl11ba-ATG-MO* target sequence (yellow box) fused in-frame with mCherry; C, 100pg *bcl11ba-N-mCherry* or control mCherry mRNA injected with a standard control morpholino or *bcl11ba-ATG-MO*. Embryos were photographed at 6 or 24 hpf.

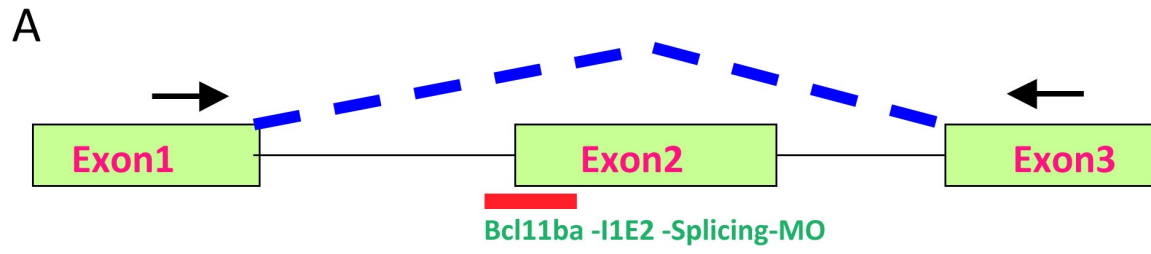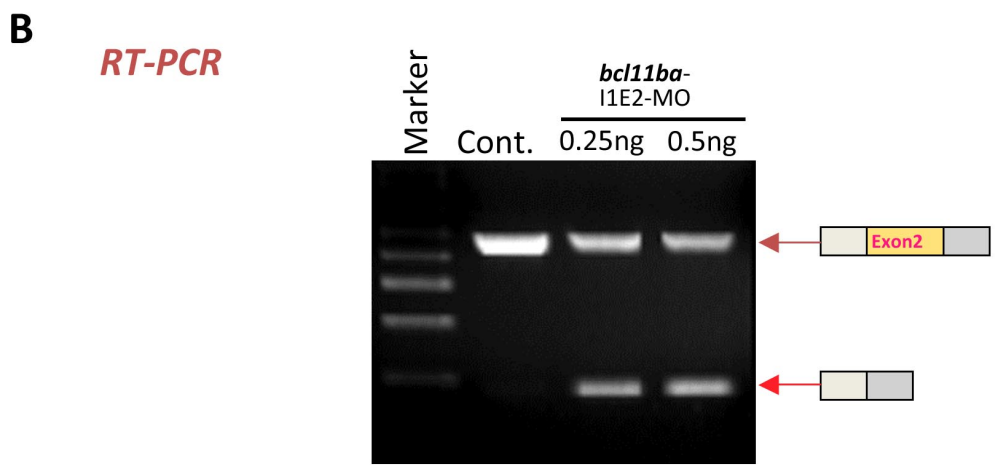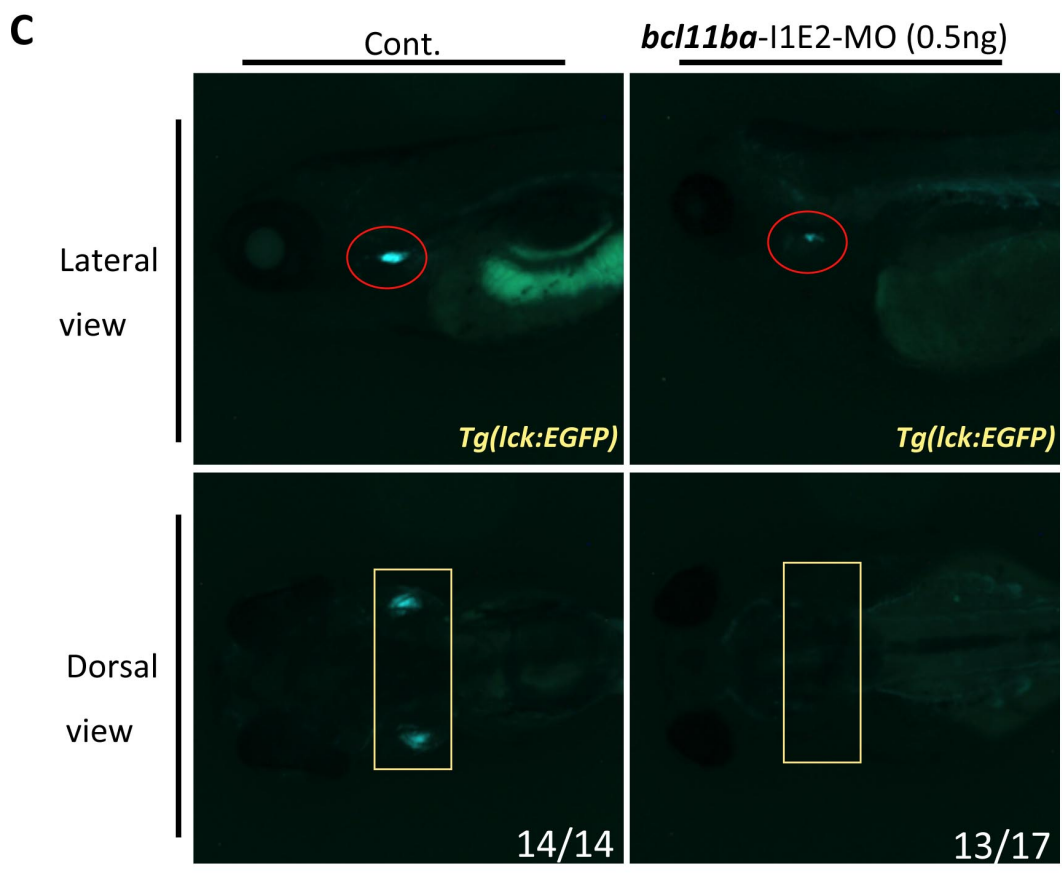

**Figure S5: Effect of splice site *bcl11b* morpholino on T cell development in zebrafish.**

A, Targeting site of *bcl11ba*-I2E3-splicing morpholino, red, to mediate knockdown by excision of exon 2 from the *bcl11ba* transcript; B, 0.25 or 0.5ng *bcl11ba*-I2E3-splicing morpholino injected into 1-cell stage WT embryo, confirming mis-splicing of *bcl11ba* mRNA by RT-PCR at 5dpf; C, 0.5ng *bcl11ba*-I2E3-splicing morpholino injected into Tg(lck:EGFP) embryos to monitor T lineage development. T cells failed to appear in the thymi of splicing morphants (red circles: lateral view, yellow boxes: dorsal view). Numbers in lower right of pictures denote the proportion of embryos with the depicted phenotype.

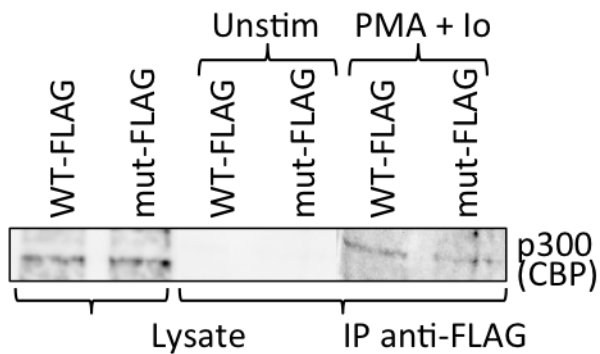

**Figure S6: pN441K mutation does not affect binding to CBP.**

Western blot detecting association of p300 (CBP) with BCL11B in nuclear protein extracts from Jurkat cells transfected with equal amounts of FLAG-tagged WT or mutant *BCL11B* cDNA plasmids. Left 2 lanes, nuclear lysates from unstimulated cells; middle and right lanes, nuclear lysates from unstimulated or PMA and ionomycin stimulated (PMA+Io) cells, respectively, immunoprecipitated with anti-FLAG antibody and blotted with anti-p300.

A

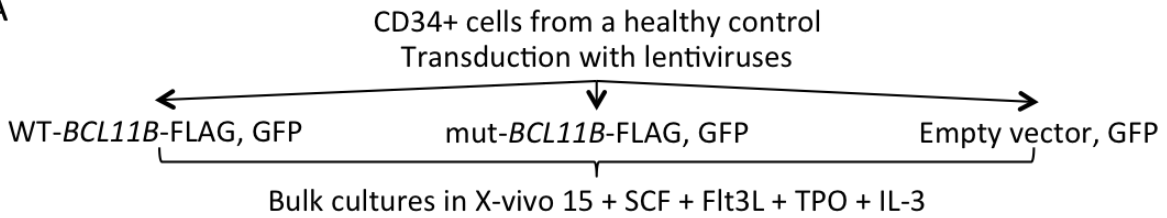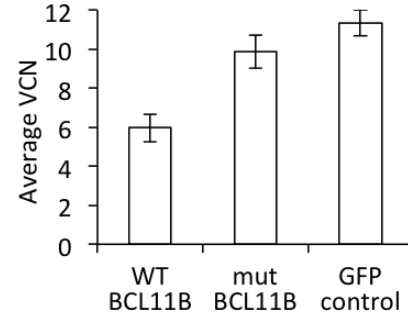

Day 14:

•GFP+ cells from each sample sorted equally into 3 separate aliquots to form triplicate samples for further treatment. Therefore:

- WT-*BCL11B*, selected GFP+ cells: 3 samples
- mut-*BCL11B*, selected GFP+ cells: 3 samples
- GFP control, selected GFP+ cells: 3 samples

•Sorted cells sonicated to obtain 200 – 400 bp DNA fragments.

•DNA used for immunoprecipitation (IP) with anti-FLAG antibody.

•DNA obtained after IP subjected to library prep and sequencing.

•Analysis of the sequences:

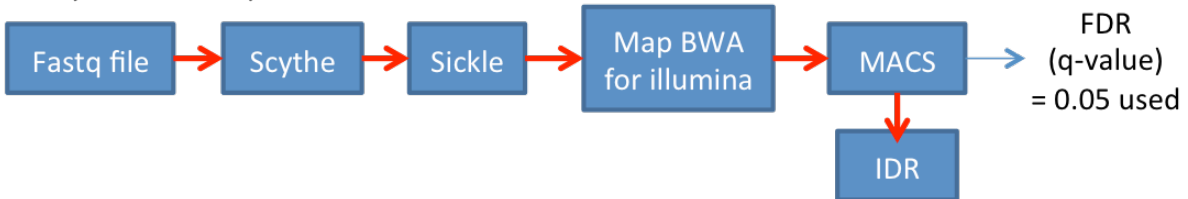

Used to combine information between samples.

- 2 sites in *BCL11B* (*BCL11B\_1*, *BCL11B\_2*) detected in WT, with significantly decreased binding by mut *BCL11B*.
- 1 site in *TACC1* detected in mut, with no binding at that site by WT *BCL11B*.

Differences in amount of binding at above sites verified by qPCR of DNA obtained after immunoprecipitation with anti-FLAG antibody on Day 14 (see Figure 3H in main text).

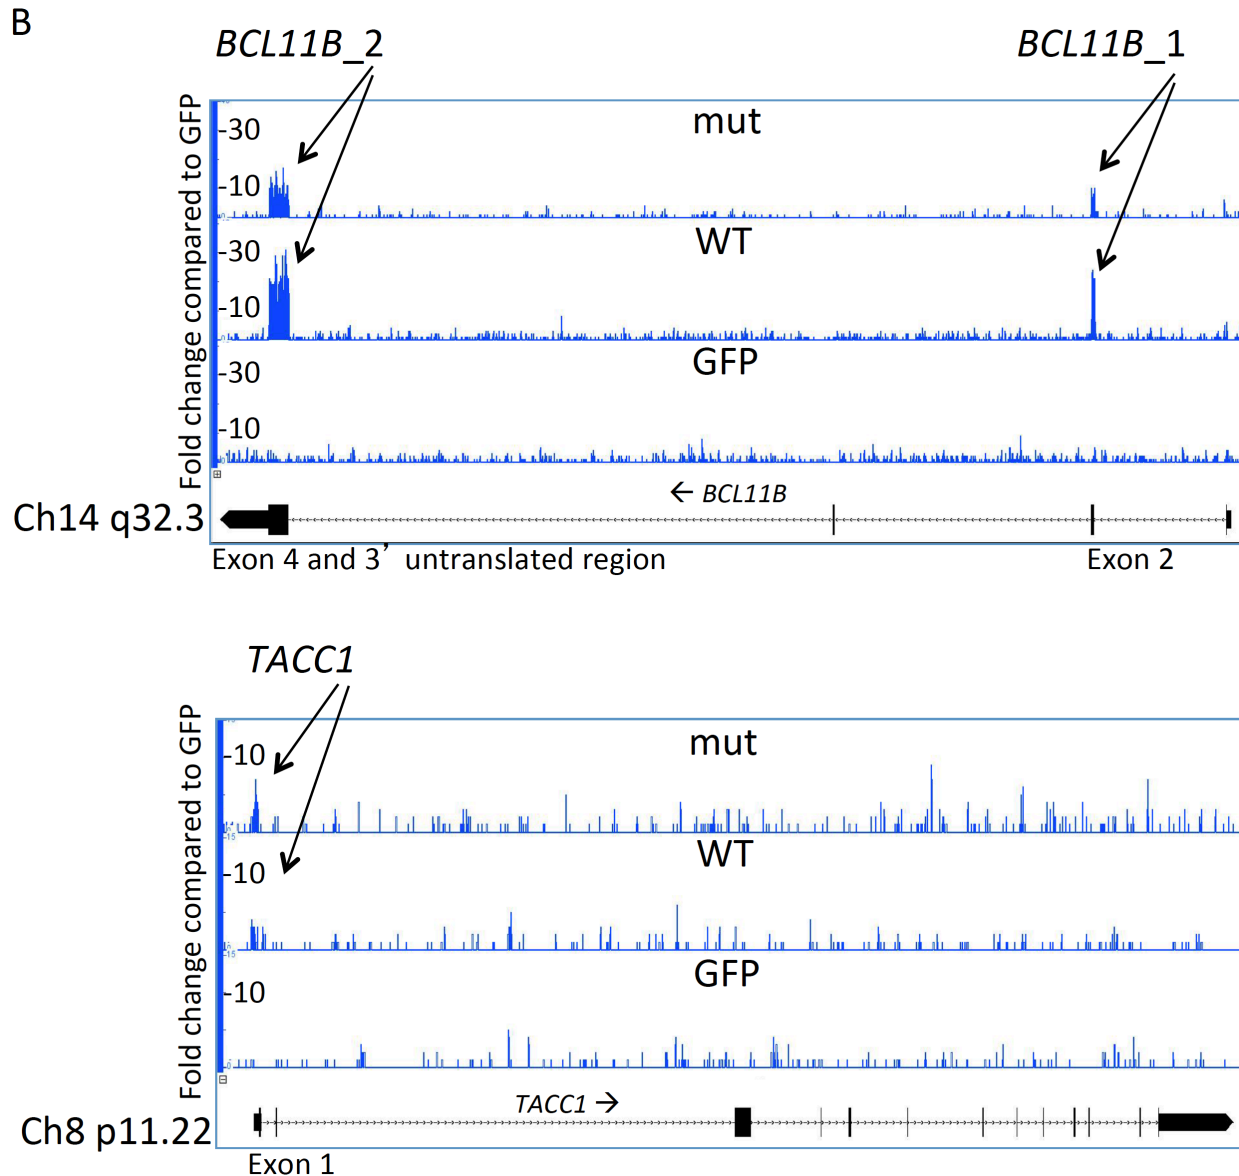

**Figure S7: ChIP-seq method and results.**

A, Schematic representation of the design, execution and analysis of ChIP-seq, carried out using DNA from control human HSC transduced with FLAG-tagged WT or mutant *BCL11B* or empty vector (GFP control), immunoprecipitated (IP) with anti-FLAG antibody and sequenced; B, Aligned reads from sequences obtained after IP in representative samples transduced with WT *BCL11B*, mutant *BCL11B* or GFP control. Top panel: two species-conserved, canonical *BCL11B* binding sites within the *BCL11B* locus itself demonstrate reduced affinity in samples overexpressing pN441K mutant *BCL11B* and no signal in GFP controls. Bottom panel: a unique DNA binding site within *TACC1* for pN441K mutant *BCL11B*, with no significant binding at this site in samples overexpressing WT *BCL11B* or GFP.

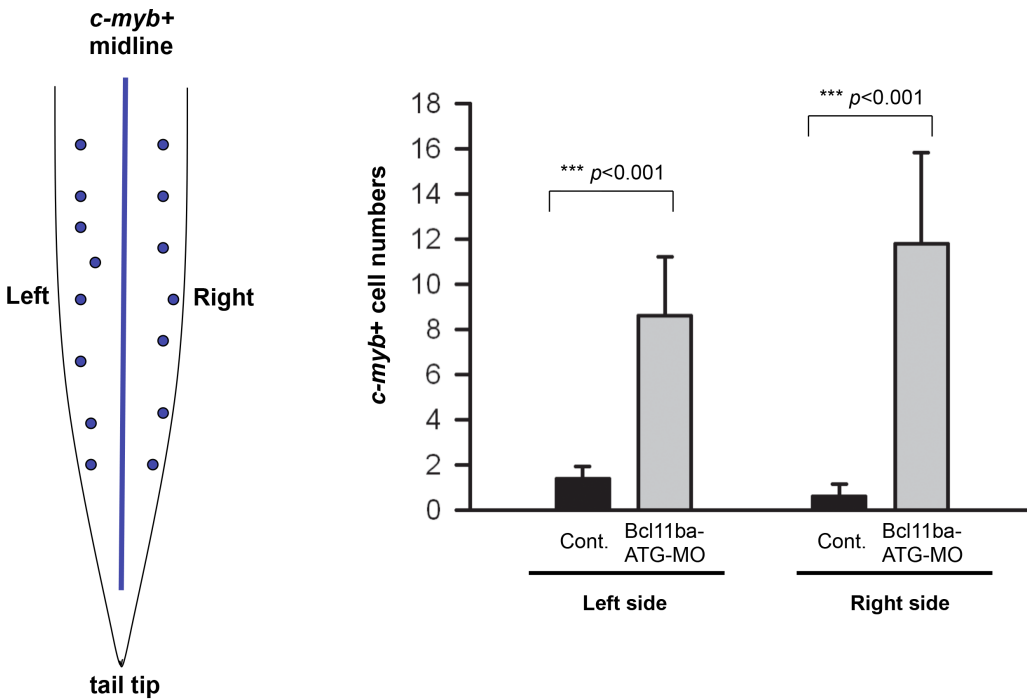

**Figure S8: Bcl11b knockdown causes HSC displacement.**

Embryos injected with *bcl11b*-ATG-MO to block translation of *bcl11b* mRNA, followed by *c-myb* WISH staining at 36hpf (1.5dpf) to examine the localization of hematopoietic stem and progenitor cells (HSPC). Displaced HSPC to left and right of the midline were quantified in double-blinded experiments. \*\*  $p < 0.001$ .

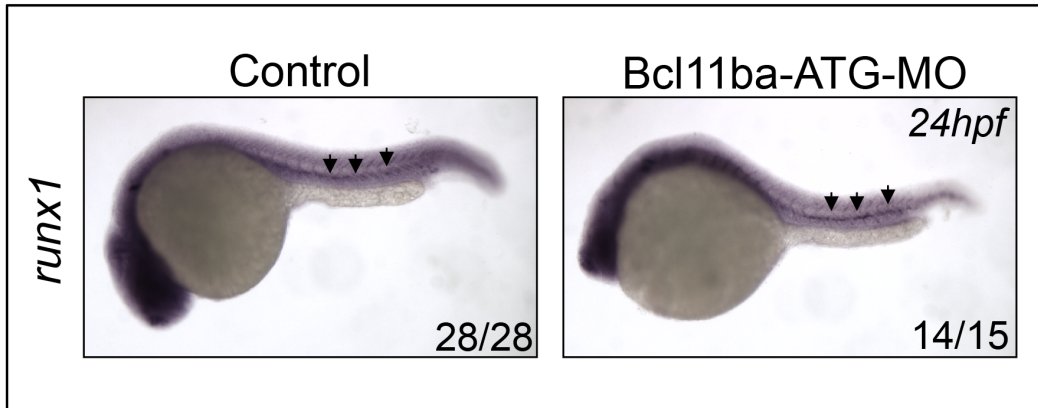

**Figure S9: Bcl11b knockdown does not impair HSC emergence.**

Embryos injected with *Bcl11b*-ATG-MO to block translation of *bcl11b* mRNA, following which the emergence of HSC was monitored at 24hpf by performing WISH with a probe reactive with *runx1*, a transcription factor required for HSC emergence. The numbers on the pictures denote the fraction of embryos with the depicted phenotype.



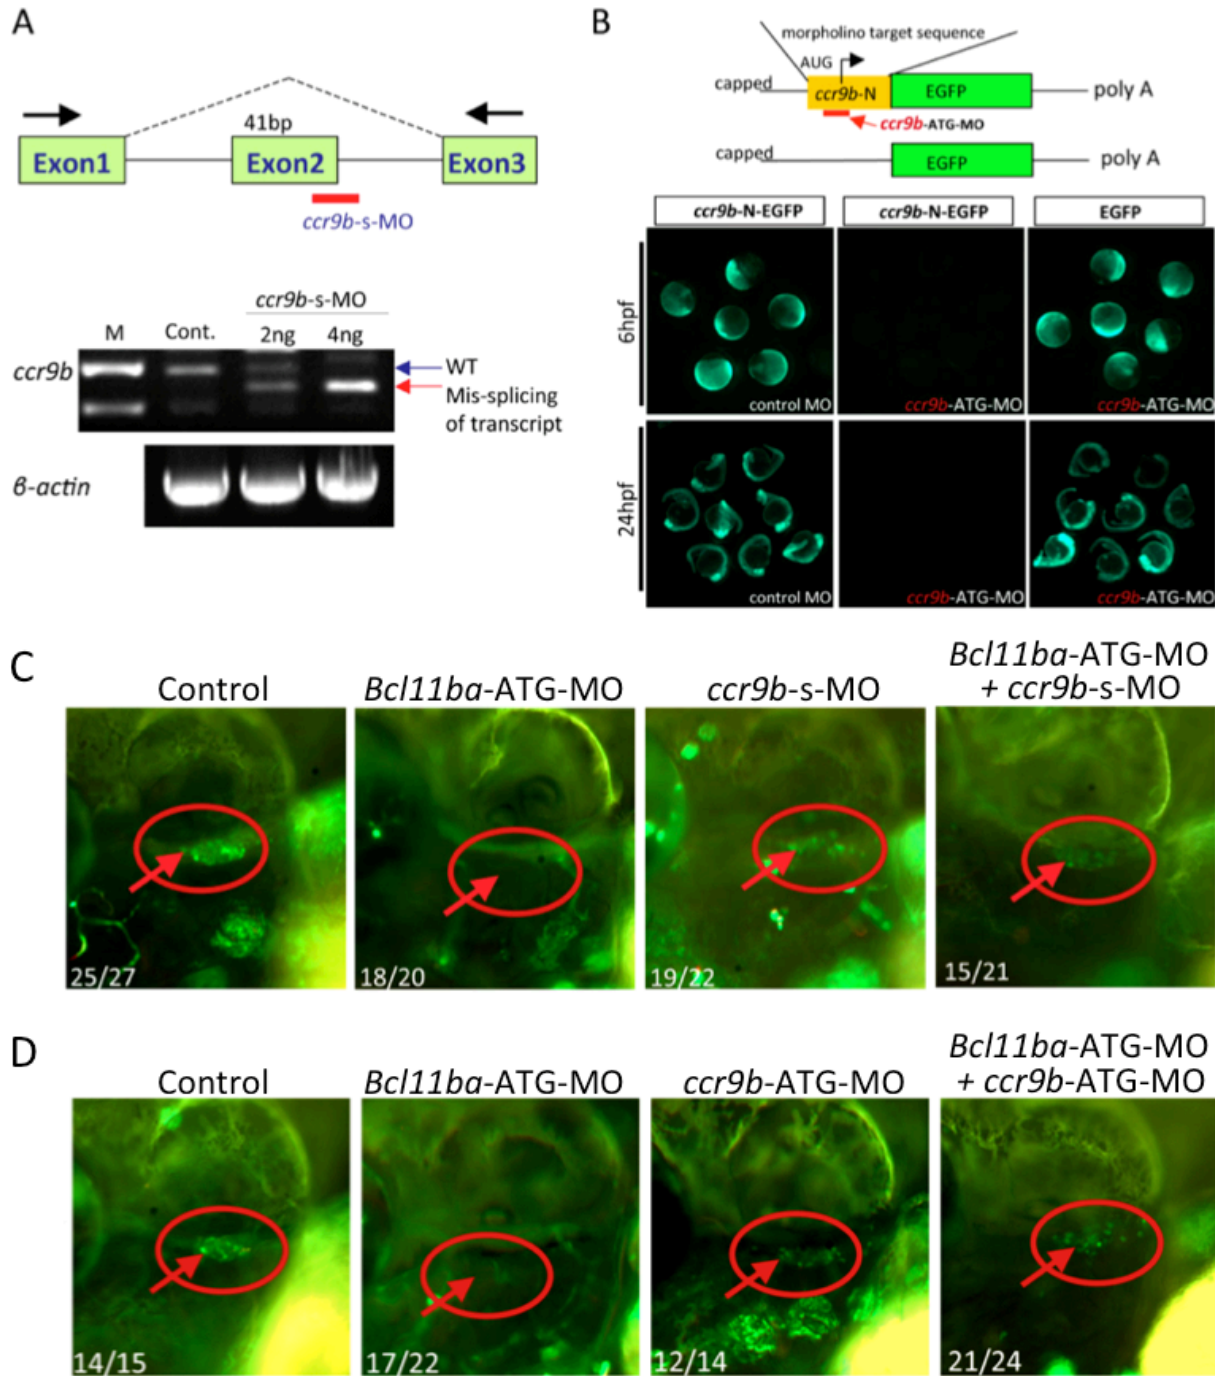

**Figure S10. Effect of *ccr9b* dysregulation on thymic seeding in *bcl11b* morphants.**

A. Diagram of the *ccr9b*-splice site morpholino targeting the exon2-intron2 junction (red bar). 2 or 4ng *ccr9b*-splice site morpholino was injected into 1-cell stage WT embryos, following which mis-splicing of *ccr9b* mRNA was confirmed by RT-PCR.  $\beta$ -actin mRNA was used as an internal loading control. Red arrow indicates the mis-splicing of *ccr9b* transcript.

B. Top, diagram of the *ccr9b*-N-EGFP fluorescent reporter containing or lacking the *ccr9b*-ATG-MO target sequence (orange box) fused in-frame with EGFP. Bottom, 100pg *ccr9b*-N-

EGFP or control EGFP mRNA was injected with standard control MO or *ccr9b*-ATG-MO. The embryos were photographed at 6 or 24hpf.

C. Rescue of thymic seeding in *bcl11ba* morphants by *ccr9* knockdown. *Tg(cd41:EGFP)* were injected at the 1-cell stage with either 4ng of Bcl11b-ATG-MO, 2ng *ccr9b*-s-MO, or both together, following which the effect on thymic seeding of *cd41*<sup>+</sup> cells was assessed at 5dpf (thymus location indicated by red circle and arrow).

D. Effect of morpholino (*ccr9b*-ATG-MO) knockdown of *ccr9b* either alone or in combination with Bcl11ba-ATG-MO, on thymic seeding at 5dpf in transgenic *Tg(cd41:EGFP)* zebrafish embryos (lateral view, red circles). Numbers refer to the fraction of embryos exhibiting the depicted phenotype.

## Supplementary tables

**Table S1: Exome quality measures**

### A) Mapping

| Exome   | #Reads      | #Duplicates (%)  | #Unmapped Reads (%) | #RPDC <sup>a</sup> | MQ <sup>b</sup> <20 | #ROSc              | #RSS <sup>d</sup> | Inferred insert size statistics <sup>e</sup> |             |        |       |
|---------|-------------|------------------|---------------------|--------------------|---------------------|--------------------|-------------------|----------------------------------------------|-------------|--------|-------|
|         |             |                  |                     |                    |                     |                    |                   | shortest                                     | longest     | median | mean  |
| Proband | 83,095,910  | 2,552,454 (3.1%) | 837,867 (1.0%)      | 124,238            | 12,953,119 (15.7%)  | 33,779,597 (85.4%) | 4,569             | 101                                          | 228,180,394 | 233    | 2,399 |
| Mother  | 11,3706,386 | 3,892,916 (3.4%) | 1,402,017 (1.2%)    | 212,436            | 17,544,739 (15.6%)  | 46,211,524 (86.1%) | 6,079             | 101                                          | 244,804,760 | 227    | 2,963 |
| Father  | 116,877,772 | 3,673,700 (3.1%) | 1,019,119 (0.9%)    | 209,487            | 18,375,087 (15.9%)  | 47,470,967 (85.1%) | 6,127             | 101                                          | 243,566,370 | 227    | 2,661 |

<sup>a</sup>RPDC: Reads with pairs mapped to different chromosomes

<sup>b</sup>MQ: Reads with low mapping quality <20

<sup>c</sup>ROS: Read pairs with mapping quality (MQ) ≥20 and duplicates excluded mapped to opposite strands

<sup>d</sup>RSS: Read pairs mapped to the same strand.

<sup>e</sup>Inferred insert sizes calculated on read pairs with MQ ≥20, both mapped (duplicates excluded).

**B) Coverage:** High quality (≥20) reads in the Nimblegen v3.0 capture region, excluding duplicates and reads not properly paired. The right 4 columns list the fraction of capture positions covered by at least 1, 15, 30 and 45 reads, respectively.

| Exome   | Mean | Sdev | Median | Mode | ≥1X  | ≥15X | ≥30X | ≥45X |
|---------|------|------|--------|------|------|------|------|------|
| Proband | 64.6 | 42.1 | 59.0   | 0.0  | 0.97 | 0.93 | 0.86 | 0.69 |
| Mother  | 88.9 | 59.7 | 81.0   | 0.0  | 0.97 | 0.93 | 0.90 | 0.82 |
| Father  | 91.3 | 61.7 | 83.0   | 0.0  | 0.97 | 0.94 | 0.90 | 0.83 |

**C) Ti/Tv ratios:** Only single nucleotide variants in the Nimblegen v3.0 capture region that were marked PASS had GQ≥30.

| Exomes  | All <sup>a</sup> | Known <sup>b</sup> | Novel <sup>c</sup> |
|---------|------------------|--------------------|--------------------|
| Proband | 2.63             | 2.64               | 2.27               |
| Mother  | 2.63             | 2.63               | 2.27               |
| Father  | 2.62             | 2.63               | 2.19               |

<sup>a</sup>For reference, Ti/Tv ratio for 1000 genomes (phase 1) across the capture region is 2.67.

<sup>b</sup>Known variants, those that occur in 1000 genomes (phase 1).

<sup>c</sup>Novel variants, those that are not in 1000 genomes.

**D) Inheritance validation:** Variants with PASS annotation and GQ >30 in the proband assessed for inheritance from parents.

| Source of proband variant       | SNVs  |                    | INDELs |       |
|---------------------------------|-------|--------------------|--------|-------|
|                                 | Known | Novel <sup>a</sup> | Known  | Novel |
| Father                          | 10332 | 361                | 536    | 514   |
| Mother                          | 10334 | 313                | 522    | 504   |
| Both parents                    | 15521 | 33                 | 835    | 533   |
| One of the parents <sup>b</sup> | 3950  | 5                  | 227    | 435   |
| De novo                         | 116   | 5                  | 23     | 247   |
| Total                           | 40253 | 717                | 2143   | 2233  |

<sup>a</sup>Variants were deemed novel if absent in 1000 Genomes database.

<sup>b</sup>Instances in which unambiguous assignment of parent not possible.

**Table S2: List of genes involved in primary immunodeficiencies<sup>5</sup> or T cell development.**

|         |         |        |        |
|---------|---------|--------|--------|
| ADAMTS8 | CIITA   | JAK3   | RMRP   |
| AIRE    | CORO1A  | LCK    | SH2D1A |
| AK2     | CYBB    | LIG4   | STAT5B |
| ATM     | DCLRE1C | NBN    | STIM1  |
| BTK     | DKC1    | NHEJ1  | TAP1   |
| CD247   | DOCK8   | ORAI1  | TAP2   |
| CD3D    | FOXP1   | PNPLA2 | TAPBP  |
| CD3G    | IKBKG   | PRKDC  | TBX1   |
| CD40LG  | IL2RA   | PTPRC  | WAS    |
| CD8A    | IL2RG   | RAG1   | XIAP   |
| CD8B    | IL7R    | RAG2   | ZAP70  |
| CHD7    | ITK     | RFXANK | ZBTB1  |

**Table S3: Terms associated with T cell related phenotypes Mouse Genome Informatics and Human Phenotype Ontology Annotation, used to extend the target gene list.**

| <u>MGI &amp; HPO T cell related terms</u> | <u>Scores of the genes associated with each term</u> |
|-------------------------------------------|------------------------------------------------------|
| absent CD4 T cell                         | 2                                                    |
| absent CD8 T cell                         | 2                                                    |
| absent T cell                             | 2                                                    |
| decreased CD4 T cell                      | 2                                                    |
| decreased CD8 T cell                      | 2                                                    |
| decreased double-positive T cell number   | 2                                                    |
| decreased double-negative T cell number   | 2                                                    |
| decreased single-positive T cell number   | 2                                                    |
| decreased T cell number                   | 2                                                    |
| T-lymphopenia                             | 2                                                    |
| abnormal differentiation of T cells       | 0.5                                                  |
| absent lymphocyte                         | 0.5                                                  |
| decreased lymphocyte cell number          | 0.5                                                  |
| T cell lymphoma                           | 0.5                                                  |
| T cell leukemia                           | 0.5                                                  |

**Table S4: Terms obtained by using the target gene list as input to the ToppFun program.**

**a) Enriched disease terms**

Severe combined immunodeficiency  
 Acute lymphoid leukemia  
 Agammaglobulinemia, X-linked; XLA  
 Alpha/beta T-cell lymphopenia with gamma/delta T-cell expansion, severe cytomegalovirus infection, and autoimmunity  
 Ataxia Telangiectasia  
 Atypical Mycobacteriosis, Familial, X-linked 1; AMCBX1  
 Autoimmune polyendocrinopathy syndrome, type 1  
 Bare lymphocyte syndrome 2  
 Bruton type agammaglobulinemia  
 Cd8 deficiency, familial  
 CHARGE association  
 CHARGE Syndrome  
 Combined immunodeficiency, X-linked  
 DiGeorge Syndrome  
 Ectodermal Dysplasia, Anhidrotic, with Immunodeficiency, Osteopetrosis, and Lymphedema  
 Granulomatous Disease, Chronic, X-Linked  
 Growth hormone insensitivity with immunodeficiency  
 Hyper-IgM Immunodeficiency Syndrome, Type 1  
 Hypogammaglobulinemia and Isolated growth hormone deficiency, X-linked  
 Hypohidrotic ectodermal dysplasia with immune deficiency  
 Immune dysfunction with T-cell inactivation due to calcium entry defect 1, 2

Immunodeficiency 17  
 Immunodeficiency 19  
 Immunodeficiency 22  
 Immunodeficiency 26 with or without neurologic abnormalities  
 Immunodeficiency 8  
 Immunodeficiency due to defect in CD3-gamma  
 Immunodeficiency due to Defect in CD3-Zeta  
 Immunodeficiency with hyper IgM type 1  
 Immunodeficiency without anhidrotic ectodermal dysplasia  
 Immunologic Deficiency Syndromes  
 Interleukin 2 Receptor, Alpha, Deficiency of  
 LIG4 Syndrome  
 Lymphoproliferative syndrome 1  
 Lymphoproliferative Syndrome, X-Linked, 2  
 Microcephaly, normal intelligence and immunodeficiency  
 Nijmegen Breakage Syndrome  
 Omenn syndrome  
 Polyglandular autoimmune syndrome, type 1  
 Stromal Interaction Molecule 1; STIM1  
 T-cell immunodeficiency, congenital alopecia, nail dystrophy  
 T-Lymphocytopenia  
 Wiskott-Aldrich Syndrome  
 X-linked lymphoproliferative syndrome 1  
 X-linked severe combined immunodeficiency

**b) Enriched pathway terms**

TCR signaling in naive CD8+ T cells  
 Activation of Csk by cAMP-dependent Protein Kinase Inhibits Signaling through the T Cell Receptor  
 Adaptive Immune System  
 Antigen processing and presentation  
 Apoptosis  
 ATM mediated phosphorylation of repair proteins  
 ATM mediated response to DNA double-strand break  
 ATM Signaling Pathway  
 B Cell Receptor Signaling Pathway  
 BARD1 signaling events BCR signaling pathway  
 Calcium signaling in the CD4+ TCR pathway  
 Canonical NF-kappaB pathway  
 CD40L Signaling Pathway  
 Cell Cycle: G2/M Checkpoint Costimulation by the CD28 family  
 CTL mediated immune response against target cells  
 CXCR4-mediated signaling events  
 Cytokine Signaling in Immune system  
 DNA Repair Double-Strand Break Repair  
 Downstream signaling in naive CD8+ T cells  
 Downstream TCR signaling Hematopoietic cell lineage  
 Homologous recombination Homologous Recombination Repair  
 Homologous recombination repair of replication-independent double-strand breaks  
 IL 17 Signaling Pathway  
 IL 2 signaling pathway  
 IL 4 signaling pathway  
 IL-2 Receptor Beta Chain in T cell Activation  
 IL-2 Signaling pathway IL-4 signaling Pathway  
 IL-7 Signal Transduction  
 IL-7 Signaling Pathway  
 IL-9 Signaling Pathway  
 IL12 and Stat4 Dependent Signaling Pathway in Th1 Development  
 IL12 signaling mediated by STAT4

IL12-mediated signaling events  
 IL2 signaling events mediated by PI3K  
 IL2 signaling events mediated by STAT5  
 IL2-mediated signaling events  
 IL4-mediated signaling events  
 Immunoregulatory interactions between a Lymphoid and a non-Lymphoid cell  
 Interleukin 4 (IL-4) Pathway  
 Interleukin receptor SHC signaling Interleukin-2 signaling  
 Interleukin-3, 5 and GM-CSF signaling  
 Interleukin-7 signaling  
 JAK-STAT signaling Jak-STAT signaling pathway  
 JAK/STAT signaling pathway Lck and Fyn tyrosine kinases in initiation of TCR Activation  
 Nef and signal transduction Nef-mediates down modulation of cell surface receptors by recruiting them to clathrin adapters  
 NO2-dependent IL 12 Pathway in NK cells  
 Non-homologous end-joining Nonhomologous End-joining (NHEJ)  
 PD-1 signaling Phosphorylation of CD3 and TCR zeta chains  
 Recruitment of repair and signaling proteins to double-strand breaks  
 Role of Tob in T-cell activation Signaling by Interleukins  
 Signaling by the B Cell Receptor (BCR)  
 Stathmin and breast cancer resistance to antimicrotubule agents  
 T cell activation  
 T cell receptor signaling pathway  
 T Cell Signal Transduction  
 T Cytotoxic Cell Surface Molecules  
 TCR signaling TCR signaling in naive CD4+ T cells  
 TCR Signaling Pathway Th1/Th2 Differentiation  
 The Co-Stimulatory Signal During T-cell Activation  
 Translocation of ZAP-70 to Immunological synapse  
 Innate Immune system

### c) Enriched gene ontology (GO) terms

activated T cell proliferation  
activation of immune response  
adaptive immune response adaptive  
immune response based on somatic recombination of immune receptors built from immunoglobulin superfamily domains anatomical structure homeostasis antigen processing and presentation  
antigen processing and presentation of endogenous antigen  
antigen processing and presentation of endogenous peptide antigen  
antigen processing and presentation of exogenous peptide antigen via MHC class I  
antigen processing and presentation of exogenous peptide antigen via MHC class  
TAP-dependent antigen processing and presentation of peptide antigen via MHC class I antigen receptor-mediated signaling pathway apoptotic process apoptotic signaling pathway  
B cell cytokine production  
B cell differentiation  
B cell homeostatic proliferation  
B cell lineage commitment B cell mediated immunity  
B cell proliferation B cell receptor signaling pathway  
calcium-mediated signaling  
CD40 receptor binding  
CD8 receptor binding  
cell activation involved in immune response  
cell-type specific apoptotic process  
cellular response to cytokine stimulus  
cellular response to DNA damage stimulus cellular response to growth hormone stimulus cellular response to interleukin-15 cellular response to interleukin-4  
cytokine production involved in immune response  
cytokine-mediated signaling pathway  
DNA damage checkpoint  
DNA integrity checkpoint  
DNA ligase (ATP) activity  
DNA ligase activity  
DNA ligation involved in DNA recombination  
DNA metabolic process DNA recombination  
DNA repair  
DNA-dependent protein kinase activity  
double-strand break repair  
double-strand break repair via homologous recombination  
double-strand break repair via nonhomologous end joining  
FasL biosynthetic process Fc receptor mediated stimulatory signaling pathway  
Fc receptor signaling pathway Fc-gamma receptor signaling pathway  
Fc-gamma receptor signaling pathway involved in phagocytosis  
G2 DNA damage checkpoint hematopoietic or lymphoid organ development  
hematopoietic progenitor cell differentiation  
hemopoiesis  
homeostasis of number of cells  
homeostatic process  
immature B cell differentiation  
immune effector process  
immune response-activating cell surface receptor signaling pathway  
immune response-activating signal transduction  
immune response-regulating cell surface receptor signaling pathway  
immune response-regulating cell surface receptor signaling pathway involved in phagocytosis  
immune response-regulating signaling pathway  
immune system development  
immunoglobulin mediated immune response  
immunoglobulin production  
immunoglobulin production involved in immunoglobulin mediated immune response immunoglobulin V(D)J recombination  
inflammatory response  
innate immune response  
interleukin-10 production  
interleukin-12 production  
interleukin-2 binding  
interleukin-2 receptor activity  
interleukin-2-mediated signaling pathway  
interleukin-4-mediated signaling pathway  
interleukin-7 binding  
interleukin-7 receptor activity  
interleukin-7-mediated signaling pathway  
isotype switching  
JAK-STAT cascade  
JAK-STAT cascade involved in growth hormone signaling pathway  
leukocyte activation involved in immune response  
leukocyte apoptotic process leukocyte homeostasis  
leukocyte mediated cytotoxicity  
leukocyte mediated immunity  
leukocyte proliferation  
lymph node development  
lymphocyte activation involved in immune response  
lymphocyte apoptotic process  
lymphocyte costimulation  
lymphocyte homeostasis  
lymphocyte mediated immunity  
lymphocyte proliferation  
lymphoid progenitor cell differentiation  
MHC class I protein binding  
MHC class II biosynthetic process  
MHC protein binding  
mitotic DNA damage checkpoint  
mitotic DNA integrity checkpoint  
mitotic G2 DNA damage checkpoint  
mitotic G2/M transition checkpoint  
natural killer cell mediated cytotoxicity  
natural killer cell mediated immunity  
negative regulation of adaptive immune response  
negative regulation of apoptotic process  
negative regulation of cell killing  
negative regulation of defense response  
negative regulation of FasL biosynthetic process  
negative regulation of immune effector process  
negative regulation of immune response  
negative regulation of immune system process  
negative regulation of innate immune response  
negative regulation of leukocyte activation  
negative regulation of leukocyte apoptotic process  
negative regulation of leukocyte mediated cytotoxicity  
negative regulation of lymphocyte activation  
negative regulation of lymphocyte apoptotic process  
negative regulation of lymphocyte mediated immunity  
negative regulation of natural killer cell mediated cytotoxicity  
negative regulation of natural killer cell mediated immunity  
negative regulation of thymocyte apoptotic process  
non-recombinational repair  
nucleotide-binding oligomerization domain containing signaling pathway  
pattern recognition receptor signaling pathway  
peptidyl-tyrosine modification  
peptidyl-tyrosine phosphorylation

positive regulation of adaptive immune response  
 positive regulation of adaptive immune response based on somatic recombination of immune receptors built from immunoglobulin superfamily domains  
 positive regulation of antigen processing and presentation of peptide antigen via MHC class I positive regulation of antigen receptor-mediated signaling pathway  
 positive regulation of apoptotic signaling pathway  
 positive regulation of B cell activation  
 positive regulation of B cell differentiation  
 positive regulation of B cell proliferation  
 positive regulation of calcium-mediated signaling  
 positive regulation of cell activation  
 positive regulation of cell differentiation  
 positive regulation of cell killing  
 positive regulation of extrinsic apoptotic signaling pathway  
 positive regulation of hematopoietic stem cell migration  
 positive regulation of immune effector process  
 positive regulation of immune response  
 positive regulation of immune system process  
 positive regulation of leukocyte activation  
 positive regulation of leukocyte differentiation  
 positive regulation of leukocyte mediated cytotoxicity  
 positive regulation of leukocyte mediated immunity  
 positive regulation of leukocyte proliferation  
 positive regulation of lymphocyte activation  
 positive regulation of lymphocyte differentiation  
 positive regulation of lymphocyte mediated immunity  
 positive regulation of lymphocyte proliferation  
 positive regulation of MHC class I biosynthetic process  
 positive regulation of MHC class II biosynthetic process  
 pre-B cell allelic exclusion  
 pre-B cell differentiation  
 pro-B cell differentiation  
 production of molecular mediator of immune response  
 programmed cell death  
 protection from natural killer cell mediated cytotoxicity  
 regulation of adaptive immune response  
 regulation of adaptive immune response based on somatic recombination of immune receptors built from immunoglobulin superfamily domains regulation of antigen receptor-mediated signaling pathway  
 regulation of apoptotic process  
 regulation of B cell activation  
 regulation of B cell cytokine production  
 regulation of B cell differentiation  
 regulation of B cell mediated immunity  
 regulation of B cell proliferation  
 regulation of calcium ion transport  
 regulation of calcium-mediated signaling  
 regulation of cytokine production  
 regulation of DNA recombination  
 regulation of FasL biosynthetic process  
 regulation of immune effector process  
 regulation of immune response  
 regulation of immune system process  
 regulation of innate immune response  
 regulation of interleukin-10 production  
 regulation of interleukin-12 production  
 regulation of leukocyte activation  
 regulation of leukocyte apoptotic process  
 regulation of leukocyte differentiation  
 regulation of leukocyte mediated cytotoxicity  
 regulation of leukocyte mediated immunity  
 regulation of leukocyte proliferation  
 regulation of lymphocyte activation  
 regulation of lymphocyte apoptotic process

regulation of lymphocyte differentiation  
 regulation of lymphocyte mediated immunity  
 regulation of lymphocyte proliferation  
 regulation of MHC class II biosynthetic process  
 regulation of mononuclear cell proliferation  
 regulation of multicellular organismal development  
 regulation of natural killer cell mediated cytotoxicity  
 regulation of natural killer cell mediated immunity  
 regulation of production of molecular mediator of immune response  
 regulation of programmed cell death regulation of protein autophosphorylation  
 regulation of protein linear polyubiquitination  
 regulation of response to biotic stimulus  
 regulation of response to stress regulation of T cell activation  
 regulation of T cell differentiation.  
 regulation of thymocyte apoptotic process  
 response to biotic stimulus response to external biotic stimulus  
 response to gamma radiation  
 response to interleukin-15  
 response to interleukin-2  
 response to interleukin-4 response to interleukin-9  
 response to ionizing radiation  
 response to other organism  
 response to wounding  
 semicircular canal development  
 signal transduction in response to DNA damage  
 signal transduction involved in cell cycle checkpoint  
 signal transduction involved in DNA damage checkpoint  
 signal transduction involved in DNA integrity checkpoint  
 signal transduction involved in G2 DNA damage checkpoint  
 signal transduction involved in mitotic cell cycle checkpoint  
 signal transduction involved in mitotic DNA damage checkpoint  
 signal transduction involved in mitotic DNA integrity checkpoint  
 signal transduction involved in mitotic G2 DNA damage checkpoint  
 somatic cell DNA recombination  
 somatic diversification of immune receptors  
 somatic diversification of immune receptors via germline recombination within a single locus somatic diversification of immunoglobulins  
 somatic diversification of immunoglobulins involved in immune response  
 somatic recombination of immunoglobulin gene segments  
 somatic recombination of immunoglobulin genes involved in immune response  
 T cell differentiation  
 T cell differentiation in thymus  
 T cell homeostasis  
 T cell receptor binding  
 T cell receptor complex  
 T cell receptor signalling pathway  
 T/G mismatch-specific endonuclease activity  
 TAP binding  
 TAP1 binding  
 TAP2 binding  
 telomere maintenance  
 telomere organization  
 thymocyte apoptotic process thymus development toll-like receptor TLR1:  
 TLR2 signaling pathway toll-like receptor TLR6:  
 TLR2 signaling pathway tyrosine phosphorylation of STAT protein  
 tyrosine phosphorylation of Stat5 protein V(D)J recombination

#### **d) Enriched human phenotype (HPO) terms**

Severe T lymphocytopenia  
Abnormality of B cell number  
Abnormality of B cell physiology  
Abnormality of B cells  
Abnormality of bone marrow cell morphology  
Abnormality of CD4+ T cells  
Abnormality of CD8+ T cells  
Abnormality of cells of the lymphoid lineage  
Abnormality of cellular immune system  
Abnormality of granulocytes  
Abnormality of humoral immunity  
Abnormality of immune system physiology  
Abnormality of leukocytes  
Abnormality of lymphocytes  
Abnormality of myeloid leukocytes  
Abnormality of T cells  
Abnormality of the immune system  
Abnormality of the intestine  
Aplasia of the thymus

Aplasia/Hypoplasia of the thymus  
B lymphocytopenia  
Cellular immunodeficiency  
Combined immunodeficiency  
Decreased number of CD4+ T cells  
Decreased number of CD8+ T cells  
Hypergammaglobulinemia  
Hyperglobulinemia  
Hypogammaglobulinemia  
IgG deficiency  
Immunodeficiency  
Immunoglobulin abnormality  
Impaired memory B-cell generation  
Lymphadenopathy  
Lymphoma  
Lymphopenia  
Severe B lymphocytopenia  
Severe combined immunodeficiency  
T lymphocytopenia Thyroiditis

#### **e) Enriched mouse phenotype terms**

decreased T cell number  
abnormal abdominal lymph node morphology  
abnormal adaptive immunity  
abnormal alpha-beta intraepithelial T cell morphology  
abnormal alpha-beta T cell morphology  
abnormal alpha-beta T cell number  
abnormal antigen presentation via MHC class I  
abnormal B cell activation  
abnormal B cell differentiation  
abnormal B cell morphology  
abnormal B cell number  
abnormal B cell physiology  
abnormal B lymphocyte  
antigen presentation  
abnormal B-1 B cell morphology  
abnormal B-1 B cell number  
abnormal bone marrow cell morphology/development  
abnormal bone marrow cell number  
abnormal bone marrow hematopoietic cell morphology  
abnormal CD4-positive helper T cell morphology  
abnormal CD4-positive T cell differentiation  
abnormal CD4-positive, alpha beta T cell morphology  
abnormal CD4-positive, alpha beta T cell number  
abnormal CD4-positive, alpha-beta memory T cell number  
abnormal CD4-positive, a-b T cell physiology abnormal CD8-  
positive, a-b T cell morphology  
abnormal CD8-positive, alpha-beta memory T cell morphology  
abnormal CD8-positive, alpha-beta memory T cell number  
abnormal CD8-positive, alpha-beta T cell differentiation  
abnormal CD8-positive, alpha-beta T cell number  
abnormal CD8-positive, alpha-beta T cell physiology  
abnormal cell-mediated immunity  
abnormal chemokine secretion  
abnormal chromosome stability  
abnormal class switch recombination  
abnormal cytokine secretion  
abnormal cytotoxic T cell cytolysis  
abnormal cytotoxic T cell physiology  
abnormal definitive hematopoiesis  
Abnormal differentiation of T cells  
abnormal DNA repair  
abnormal double-negative T cell morphology  
abnormal double-positive T cell morphology  
abnormal effector T cell morphology  
abnormal effector T cell number  
abnormal follicular B cell morphology

abnormal gamma-delta intraepithelial T cell morphology  
abnormal gamma-delta T cell differentiation  
abnormal gamma-delta T cell morphology  
abnormal gamma-delta T cell number  
abnormal hematopoietic cell morphology  
abnormal hematopoietic cell number  
abnormal hematopoietic stem cell morphology  
abnormal hematopoietic system physiology  
abnormal hemopoiesis abnormal humoral immune response  
abnormal Immunoglobulin levele  
abnormal immature B cell morphology  
abnormal immature B cell number  
abnormal immune cell physiology  
abnormal immune organ physiology  
abnormal immune serum protein physiology  
abnormal immune system cell morphology  
abnormal immune system morphology abnormal immune  
system organ morphology abnormal immune system  
physiology  
abnormal immunoglobulin heavy chain V(D)J recombination  
abnormal immunoglobulin level  
abnormal immunoglobulin V(D)J recombination  
abnormal innate immunity  
abnormal interferon secretion  
abnormal interferon-gamma secretion  
abnormal interleukin secretion  
abnormal interleukin-10 secretion  
abnormal interleukin-13 secretion  
abnormal interleukin-2 secretion  
abnormal interleukin-4 secretion  
abnormal interleukin-6 secretion  
abnormal intraepithelial T cell morphology  
abnormal intraepithelial T cell number  
abnormal leukocyte cell number  
abnormal leukocyte morphology  
abnormal leukocyte physiology  
abnormal leukopoiesis  
abnormal level of surface class I molecules  
abnormal lymph node B cell domain morphology  
abnormal lymph node cell ratio  
abnormal lymph node morphology  
abnormal lymph node secondary follicle morphology  
abnormal lymph node size  
abnormal lymph organ size  
abnormal lymphocyte cell number  
abnormal lymphocyte morphology



abnormal lymphocyte physiology  
 abnormal lymphopoiesis  
 abnormal marginal zone B cell morphology  
 abnormal mature B cell morphology  
 abnormal mature B cell number  
 abnormal mature gamma-delta T cell morphology  
 abnormal memory B cell morphology  
 abnormal memory B cell number  
 abnormal memory T cell morphology  
 abnormal memory T cell number  
 abnormal monocyte morphology  
 abnormal mononuclear cell morphology  
 abnormal myeloid leukocyte morphology  
 abnormal natural killer cell mediated cytotoxicity  
 abnormal negative T cell selection  
 abnormal positive T cell selection  
 abnormal pre-B cell morphology  
 abnormal regulatory T cell morphology  
 abnormal regulatory T cell number  
 abnormal regulatory T cell physiology  
 abnormal single-positive T cell number  
 abnormal T cell activation  
 abnormal T cell apoptosis  
 abnormal T cell differentiation  
 abnormal T cell morphology  
 abnormal T cell number  
 abnormal T cell physiology  
 abnormal T cell proliferation  
 abnormal T cell receptor alpha chain V-J recombination  
 abnormal T cell receptor beta chain V(D)J recombination  
 abnormal T cell receptor delta chain V(D)J recombination  
 abnormal T cell receptor V(D)J recombination  
 abnormal T cell selection  
 abnormal T cell subpopulation ratio  
 abnormal T-helper 1 cell morphology  
 abnormal T-helper 1 physiology  
 abnormal T-helper cell morphology  
 abnormal thymocyte activation  
 abnormal thymocyte apoptosis  
 abnormal thymus cell ratio  
 abnormal thymus cortex morphology  
 abnormal thymus corticomedullary boundary morphology  
 abnormal thymus epithelium morphology  
 abnormal thymus lobule morphology  
 abnormal thymus medulla morphology  
 abnormal thymus morphology  
 abnormal thymus physiology  
 abnormal thymus size  
 abnormal thymus weight  
 abnormal transitional stage B cell morphology  
 absent B cells  
 absent CD4 T cell  
 absent CD4-positive, alpha beta T cells absent CD4-positive, alpha beta T cells  
 absent CD8 T cell absent CD8-positive, a-b T cells absent g-d T cells absent lymph node germinal center  
 absent lymph nodes  
 absent lymphocyte  
 absent mature B cells  
 absent mature gamma-delta T cells  
 absent pre-B cells  
 absent spleen germinal center  
 absent T cell absent thymus cortex  
 absent thymus medulla arrested B cell differentiation  
 arrested T cell differentiation  
 athymia  
 autoimmune response  
 chromosomal instability  
 chromosome breakage  
 decreased activated T cell number  
 decreased apoptosis  
 decreased B cell number  
 decreased B cell proliferation  
 decreased B-1 B cell number  
 decreased bone marrow cell number  
 decreased CD4 T cell  
 decreased CD4-positive, alpha beta T cell number  
 decreased CD8 T cell  
 decreased CD8-positive, alpha-beta T cell number  
 decreased cell proliferation  
 decreased cellular sensitivity to ionizing radiation  
 decreased cytotoxic T cell cytotoxicity  
 decreased DN4 thymocyte number  
 decreased double-negative T cell number  
 decreased double-positive T cell number  
 decreased follicular B cell number  
 decreased gamma-delta T cell number  
 decreased hematopoietic cell number  
 decreased hematopoietic stem cell number  
 decreased immature B cell number  
 decreased immunoglobulin level  
 decreased inflammatory response  
 decreased interferon-gamma secretion  
 decreased interleukin-13 secretion  
 decreased interleukin-2 secretion  
 decreased interleukin-6 secretion  
 decreased level of surface class I molecules  
 decreased lymphocyte decreased lymphocyte cell number  
 decreased marginal zone B cell number  
 decreased mature B cell number  
 decreased memory T cell number  
 decreased NK T cell number  
 decreased pre-B cell number  
 decreased regulatory T cell number  
 decreased single-positive T cell number  
 decreased T cell  
 decreased T cell apoptosis  
 decreased T cell number  
 decreased T cell proliferation  
 decreased thymocyte apoptosis  
 decreased thymocyte number  
 decreased thymus weight  
 decreased transitional stage B cell number  
 defective assembly of class I molecules enlarged lymph nodes  
 impaired humoral immune response  
 impaired natural killer cell mediated cytotoxicity  
 increased apoptosis  
 increased B cell derived lymphoma incidence  
 increased cellular sensitivity to gamma-irradiation  
 increased cellular sensitivity to ionizing radiation  
 increased germinal center B cell number  
 increased hemolymphoid system tumor incidence  
 increased sensitivity to induced cell death increased susceptibility to autoimmune disorder increased susceptibility to infection induced chromosome breakage  
 low lymphocyte  
 lymph node hypoplasia  
 lymphoid hypoplasia  
 lymphopenia  
 small lymph nodes  
 small spleen  
 small thymus  
 spontaneous chromosome breakage  
 T cell associated leukemia  
 T cell Lymphoma thymus atrophy  
 thymus hyperplasia  
 thymus hypoplasia, thymus cortex hypoplasia

**Table S5: High priority variants from exome sequence analysis.**

| Inheritance model          | Chromosome & coordinate<br>Gene | Ref/Alt allele | Amino acid change<br>HGVS name<br>cDNA position & Exon                                        | MAF in:<br>1000<br>Genomes<br>ESP | Effect<br>Prediction:<br>SIFT<br>Polyphen<br>CADD | GT:GQ:DP<br>proband<br>mother<br>father | Prioritization<br>Score |
|----------------------------|---------------------------------|----------------|-----------------------------------------------------------------------------------------------|-----------------------------------|---------------------------------------------------|-----------------------------------------|-------------------------|
| De novo                    | 14:99641850<br><i>BCL11B</i>    | A/C            | N441K<br>NM_138576.3:c.1323T>G<br>( <i>BCL11B_i001</i> )<br>NM_138576.3:n.1818T>G, Exon4      | Absent<br>Absent                  | D<br>PP2D<br>14                                   | 0/1:99:48<br>0/0:99:52<br>0/0:99:56     | 9                       |
| Compound heterozygous pair | 17:5425076<br><i>NLRP1</i>      | A/G            | M1184T<br>NM_014922.4:c.3551T>C<br>4106, Exon4                                                | 0.02<br>0.0033                    | D<br>PP2B<br>17.63                                | 0/1:99:39<br>0/1:99:63<br>0/0:99:58     | 6.5                     |
|                            | 17:5442790<br><i>NLRP1</i>      | C/T            | V939M<br>NM_014922.4:c.2815G>A<br>3370, Exon10                                                | 0.01<br>0.018                     | D<br>PP2D<br>22.8                                 | 0/1:99:57<br>0/0:99:52<br>0/1:99:75     |                         |
| Compound heterozygous pair | 4:76649893<br><i>USO1</i>       | C/A            | 5' UTR variant<br>NM_003715.2:c.-111C>A<br>( <i>CDS_not_multiple_of_3</i> ), Exon1            | 0.0046<br>Absent                  | NA <sup>a</sup><br>NA<br>9.5                      | 0/1:99:33<br>0/0:99:50<br>0/1:99:62     | 4                       |
|                            | 4:76730201<br><i>USO1</i>       | G/A            | Coding exonic<br>NM_003715.2:c.2349G>A<br>( <i>CDS_not_multiple_of_3</i> ),<br>Exon19         | 0.0027<br>0.0061                  | NA<br>NA<br>3.3                                   | 0/1:99:66<br>0/1:99:110<br>0/0:99:120   |                         |
| De novo                    | 19:36631940<br><i>CAPNS1</i>    | GGGC/G         | Deletion of glycine codon 20<br>(NonFrameShift)<br>NM_001003962.1:c.45_47delCGG<br>182, Exon2 | Absent<br>Absent                  | NA<br>NA<br>20.6                                  | 0/1:27:25<br>0/0:45:20<br>0/0:39:60     | 3.5                     |

<sup>a</sup>NA, not applicable

**Table S6 Best candidate genes and annotations.**

| Gene Prioritization    | Gene/variant annotations                         | Databases used/ prediction methods | Candidate Gene and Variant scores                             |                                                               |                                           |                                            |
|------------------------|--------------------------------------------------|------------------------------------|---------------------------------------------------------------|---------------------------------------------------------------|-------------------------------------------|--------------------------------------------|
|                        |                                                  |                                    | <i>BCL11B</i>                                                 | <i>NLRP1</i>                                                  | <i>USO1</i>                               | <i>CAPNS1</i>                              |
|                        | Protein interactions with known PID genes        | BIOGRID, MINT, HPRD                | +2<br>[Interacts with PID gene: Il2] <sup>30</sup>            | 0                                                             | +1<br>[Interacts with Xiap] <sup>35</sup> | +1<br>[Interacts with Il2rg] <sup>36</sup> |
|                        | Mammalian Phenotypes shared with known PID genes | MGI, HPO                           | +2<br>[Decreased T cell number MP:0005018] <sup>31</sup>      | 0.5<br>[Decreased lymphocyte number MP:0005016] <sup>33</sup> | 0                                         | 0                                          |
|                        | Gene Ontology terms shared with known PID genes  | UniProt                            | +1<br>[T cell differentiation in thymus] <sup>32</sup>        | +0.5<br>[Innate immune response] <sup>13</sup>                | 0                                         | 0                                          |
|                        | Gene pathways shared with known PID genes        | Pathway Commons                    | 0                                                             | +0.5<br>[Innate immune system] <sup>9</sup>                   | 0                                         | 0                                          |
|                        | Associated diseases shared with known PID genes  | OMIM, GAD, NHGRI-GWAS              | 0                                                             | +1<br>[Leukemia] <sup>34</sup>                                | 0                                         | 0                                          |
| Variant Prioritization | Inheritance model                                | Custom scripts                     | +2<br>[de novo and putative haplo-insufficient] <sup>20</sup> | +2<br>[Compound Heterozygous]                                 | +2<br>[Compound heterozygous]             | +1<br>[De novo]                            |
|                        | Predicted deleterious effect                     | [SIFT, PolyPhen2, CADD]            | +2<br>[D, PP2D,14]                                            | +2<br>[D,PP2B,17]<br>[D,PP2D,23]                              | +0.5<br>[NA, NA,9.5]<br>[NA, NA,9.5]      | +2<br>[NA, NA,20.6]                        |
| <b>Total Score</b>     |                                                  |                                    | 9                                                             | 6.5                                                           | 3.5                                       | 4                                          |

## References

1. Patel JP, Puck JM, Srinivasan R, et al. Nijmegen Breakage Syndrome Detected by Newborn Screening for T Cell Receptor Excision Circles (TRECs). *J Clin Immunol* 2015;35:227-33.
2. <http://compbio.berkeley.edu/proj/varant/>
3. 1000 Genomes Project Consortium. An integrated map of genetic variation from 1,092 human genomes. *Nature* 2012;491:56-65.
4. Exome Variant Server, NHLBI Exome Sequencing Project (ESP), Seattle, WA (URL: <http://evs.gs.washington.edu/EVS/>) [December 15, 2011]
5. Al-Herz W, Bousfiha A, Casanova JL, et al. Primary immunodeficiency diseases: an update on the classification from the international union of immunological societies expert committee for primary immunodeficiency. *Front Immunol* 2011;2:54.
6. Stark C, Breitkreutz BJ, Reguly T, Boucher L, Breitkreutz A, Tyers M. BioGRID: a general repository for interaction datasets. *Nucleic Acids Res* 2006;34:D535-9.
7. Licata L, Briganti L, Peluso D, et al. MINT, the molecular interaction database: 2012 update. *Nucleic Acids Res* 2012;40:D857-61.
8. Keshava Prasad TS, Goel R, Kandasamy K, et al. Human Protein Reference Database - 2009 Update. *Nucleic Acids Res* 2009;37:D767-72.
9. Cerami EG, Gross BE, Demir E, et al. Pathway Commons, a web resource for biological pathway data. *Nucleic Acids Res* 2011;39:D685-90.
10. Eppig JT, Blake JA, Bult CJ, Kadin JA, Richardson JE. Mouse Genome Database (MGD): facilitating mouse as a model for human biology and disease. *Nucleic Acids Res* 2015;43:D726-36.
11. Kohler S, Doelken SC, Mungall CJ, et al. The Human phenotype ontology project: linking molecular biology and disease through phenotype data. *Nucleic Acids Res* 2014;42:D966-D974.
12. Chen J, Bardes EE, Aronow BJ, Jegga AG. ToppGene Suite for gene list enrichment analysis and candidate gene prioritization. *Nucleic Acids Res* 2009;37:W305-311.
13. Magrane M and the UniProt Consortium. UniProt knowledgebase: a hub of integrated protein data. *Database* 2011;bar009.
14. Schaefer CF, Anthony K, Krupa S, et al. PID: The Pathway Interaction Database. *Nucleic Acids Res* 2009;37:D674-9.
15. Romero P, Wagg J, Green ML, Kaiser D, Krummenacker M, and Karp PD. Computational prediction of human metabolic pathways from the complete human genome. *Genome Biology* 2004;6:R2 1-17.
16. Milacic M, Haw R, Rothfels K, et al. Annotating cancer variants and anti-cancer therapeutics in reactome. *Cancers (Basel)* 2012;4:1180-211.
17. Online Mendelian Inheritance in Man, OMIM McKusick-Nathans Institute of Genetic Medicine, Johns Hopkins University (Baltimore, MD). World Wide Web URL: <http://omim.org/>
18. Becker KG, Barnes KC, Bright TJ and Wang SA. The Genetic Association Database. *Nat Genet* 2004;36:431-432.
19. Welter D, MacArthur J, Morales J, et al. The NHGRI GWAS Catalog, a curated resource of SNP-trait associations. *Nucleic Acids Res* 2014;42:D1001-1006.
20. Dang VT, Kassahn KS, Marcos AE, Ragan MA. Identification of human haploinsufficient genes and their genomic proximity to segmental duplications. *Eur J Human Genet* 2008;16:1350-7.
21. Adzhubei IA, Schmidt S, Peshkin L, et al. A method and server for predicting damaging missense mutations. *Nat Methods* 2010;7:248-9.

22. Kumar P, Henikoff S, Ng PC. Predicting the effects of coding non-synonymous variants on protein function using the SIFT algorithm. *Nat Protocols* 2009;4:1073-81.
23. Kircher M, Witten DM, Jain P, O'Roak BJ, Cooper GM, Shendure J. A general framework for estimating the relative pathogenicity of human genetic variants. *Nat Genet* 2014;46:310-5.
24. Liu X, Jian X, and Boerwinkle E. dbNSFP: A lightweight database of human non-synonymous SNPs and their functional predictions. *Hum Mutat* 2011;32:894-899.
25. Liu X, Jian X, and Boerwinkle E. dbNSFP v2.0: A database of human non-synonymous SNVs and their functional predictions and annotations. *Hum Mutat* 2013;34:E2393-E2402.
26. Radtke F, MacDonald HR, and Tacchini-Cottier F. Regulation of innate and adaptive immunity by NOTCH. *Nat Rev Immunol* 2013;13:427-437.
27. Hori S, Nomura T, Sakaguchi S. Control of regulatory T cell development by the transcription factor FoxP3. *Science*, 2003;299:1057-61.
28. Yatim A, Benne C, Sobhian B, et al. NOTCH1 nuclear interactome reveals key regulators of its transcriptional activity and oncogenic function. *Mol Cell* 2012;48:445-58.
29. Rudra D, deRoos P, Chaudhry A, et al. Transcription factor FoxP3 and its protein partners form a complex regulatory network. *Nat Immunol* 2012;13:1010-9.
30. Cismasiu VB, Ghanta S, Duque J, et al. BCL11B participates in the activation of IL2 gene expression in CD4+ T lymphocytes. *Blood* 2006;8:2695-2702.
31. Wakabayashi Y, Watanabe H, Inoue J, et al. Bcl11B is required for differentiation and survival of  $\alpha\beta$  T lymphocytes. *Nat Immunol* 2003;6:533-39.
32. Carbon S, Ireland A, Mungall CJ, Shu S, Marshall B, Lewis S, AmiGO Hub, Web Presence Working Group. AmiGO: online access to ontology and annotation data. *Bioinformatics*. 2009;25:288-9.
33. Masters SL, Gerlic M, Metcalf D, et al. NLRP1 inflammasome activation induces pyroptosis of hematopoietic progenitor cells. *Immunity* 2012;37:1009-23.
34. Enjuanes A, Benavente Y, Bosch F, et al. Genetic variants in apoptosis and immunoregulation-related genes are associated with risk of chronic lymphocytic leukemia. *Cancer Res* 2008;24:10178-86.
35. Havugimana PC, Hart GT, Nepusz T, et al. A census of human soluble protein complexes. *Cell* 2012;150:1068-81.
36. Cataldo F, Peche LY, Klaric E, et al. CAPNS1 regulates USP1 stability and maintenance of genome integrity. *Mol Cell Biol* 2013;33:2485-96.
37. Cismasiu VB, Duque J, Paskaleva E, et al. BCL11B enhances TCR/CD28-triggered NF- $\kappa$ B activation through up-regulation of Cot kinase gene expression in T-lymphocytes. *Biochemical Journal*, 2009;417:457-466.
38. Vanvalkenburgh J, Albu DI, Bapanpally C, et al. Critical role of Bcl11b in suppressor function of T regulatory cells and prevention of inflammatory bowel disease. *J Exp Med*. 2011;208:2069-81.
39. Califano D, Sweeney KJ, Le H, et al. Diverting T helper cell trafficking through increased plasticity attenuates autoimmune encephalomyelitis. *J Clin Invest*. 2014;124:174-87.
40. Gutierrez A, Kentsis A, Sanda T, et al. The BCL11B tumor suppressor is mutated across the major molecular subtypes of T-cell acute lymphoblastic leukemia. *Blood* 2011;118:4169-73.
41. Kamimura K, Ohi H, Kubota T, et al. Haploinsufficiency of Bcl11b for suppression of lymphomagenesis and thymocyte development. *Biochem Biophys Res Commun* 2007;355:538-42.
42. Bromberg Y, Guy Y and Rost B. SNAP predicts effect of mutations on protein function. *Bioinformatics* 2008;24:2397-2398.
43. Davydov EV, Goode DL, Sirota M, Cooper GM, Sidow A, Batzoglou S. Identifying a high fraction of the human genome to be under selective constraint using GERP++. *PLOS Comput Biol* 2010;6:e1001025.

44. Blankenberg D, Gordon A, Von Kuster G, Coraor N, Taylor J, Nekrutenko A; Galaxy Team. Manipulation of FASTQ data with Galaxy. *Bioinformatics*. 2010;26:1783-5.
45. Li, H, Durban R. Fast and accurate short read alignment with Burrows-Wheeler transform. *Bioinformatics*. 2009;25:1754-60
46. Zhang Y, Liu T, Meyer CA, Eeckhoute J, Johnson DS, Bernstein BE, Nusbaum C, Myers RM, Brown M, Li W, Liu XS. Model-based analysis of ChIP-Seq (MACS). *Genome Biol*. 2008;9:R137.
47. Qunhua Li, James B. Brown, Haiyan Huang, and Peter J. Bickel. Measuring reproducibility of high-throughput experiments *Ann. Appl. Stat.* 2011;5:1752-1779.
48. Nicol JW, Helt GA, Blanchard SG Jr, Raja A, Loraine AE. The Integrated Genome Browser: free software for distribution and exploration of genome-scale datasets. *Bioinformatics*. 2009;25:2730-1.
49. Gutierrez A, Kentsis A, Sanda T, et al. The BCL11B tumor suppressor is mutated across the major molecular subtypes of T-cell acute lymphoblastic leukemia. *Blood* 2011;118:4169-73.
50. Neumann M, Vosberg S, Schlee C, et al. Mutational spectrum of adult T-ALL. *Oncotarget* 2015;6:2754-66.
51. Forbes SA, Beare D, Gunasekaran P, et al. COSMIC: exploring the world's knowledge of somatic mutations in human cancer. *Nucleic Acids Res* 2015;43:D805-11.
